# Supplementary material for: Mechanisms of Vitamin C Regulating Immune and Inflammation Associated with Neonatal Hypoxic-Ischemic Encephalopathy Based on Network Pharmacology and Molecular Simulation Technology
Source: Hindawi journal article supplement (doi:10.1155/2022/4904325), 2022-02-14
Supplement: f1 [file 4904325.f1.pdf]

Supplementary Table 1: Pathogenic targets of HIE from DisGeNET, Drugbank and Genecard databases

| Gene     | Gene    | Gene   | Gene   | Gene   | Gene     | Gene     | Gene    | Gene    | Gene    | Gene    |
|----------|---------|--------|--------|--------|----------|----------|---------|---------|---------|---------|
| NOS2     | CALR    | CYP2E1 | GPI    | ITGB2  | MIR27A   | PDGFRB   | SMAD3   | IL6ST   | MIR21   | P2RX2   |
| HIF1A    | CANX    | CYP3A4 | GPT    | ITM2B  | MIR29A   | PDP1     | SMAD4   | IMMT    | MIR214  | PANK2   |
| VEGFA    | CAPN1   | DCAF8  | GPX1   | ITPR1  | MIR29B1  | PECAM1   | SMARCA1 | INA     | MIR216A | PAPPA   |
| IRAK1    | CASP1   | DCTN1  | GPX3   | JAG2   | MIR30A   | PEX1     | SMARCA2 | INHBA   | MIR22   | PARK7   |
| IRAK4    | CASP12  | DCX    | GRIA1  | JAK1   | MIR30B   | PF4      | SMARCA4 | INS     | MIR223  | PARP1   |
| EPO      | CASP3   | DDC    | GRIN1  | JUN    | MIR30E   | PFKM     | SNHG3   | INSR    | MIR224  | PC      |
| S100B    | CASP8   | DDIT3  | GRM1   | KARS1  | MIR34A   | PGF      | SOCS1   | IRS1    | MIR23A  | PCDH19  |
| MIR210   | CASP9   | DES    | GRM5   | KAT2B  | MIR374A  | PGK1     | SOCS3   | ITGA1   | MIR23B  | PCNA    |
| AASS     | CASR    | DKK1   | GRN    | KCNB1  | MIR483   | PIGF     | SOD1    | ITGA4   | MIR24-1 | PDE5A   |
| ABCB1    | CAT     | DLD    | GSK3B  | KCNH2  | MIR485   | PIK3C2A  | SOD2    | ITGAL   | MIR25   | PDGFB   |
| ABCB11   | CAV1    | DLL4   | GSR    | KCNJ11 | MIR503   | PIK3CA   | SORT1   | ITGAM   | MIR26A1 | PDGFRA  |
| ABCB7    | CBS     | DMD    | GSS    | KCNJ5  | MIR93    | PIK3CB   | SOX5    | SLC25A3 | BDKRB2  | CXCL10  |
| ABCC1    | CCDC88A | DMXL2  | GSTM1  | KCNMA1 | MIRLET7B | PIK3CG   | SP1     | SLC2A1  | BDNF    | CXCL12  |
| ABCG2    | CCK     | DNAH8  | GSTP1  | KDR    | MKI67    | PIK3R1   | SPARC   | SLC2A3  | BECN1   | CXCL8   |
| ACADM    | CCL11   | DNASE1 | GSTT1  | KEAP1  | MLYCD    | PLA2G6   | SPP1    | SLC2A4  | BGLAP   | CXCR2   |
| ACADSB   | CCL18   | DNM1   | H19    | KLF6   | MME      | PLAA     | SPTAN1  | SLC4A1  | BIRC3   | CXCR3   |
| ACE      | CCL2    | DNM1L  | HADHA  | KLLN   | MMP1     | PLAT     | SQSTM1  | SLC6A3  | BIRC5   | CXCR4   |
| ACE2     | CCL26   | DNMT3A | HADHB  | KNG1   | MMP14    | PLAU     | SRC     | SLC6A4  | BLVRB   | CYC1    |
| ACHE     | CCL3    | DOCK7  | HAGLR  | KRAS   | MMP2     | PLAUR    | SST     | SLC6A8  | BMP6    | CYCS    |
| ACKR2    | CCL4    | DRD2   | HBEGF  | KRT18  | MMP7     | PLCG1    | STAT1   | SLC8A1  | BNIP3   | CYP11A1 |
| ACTB     | CCL5    | DRD3   | HBG2   | KRT19  | MMP9     | PML      | STAT3   | SLC9A1  | BRAF    | CYP11B2 |
| ACTC1    | CCN1    | DYNLL1 | HCRT   | KRT7   | MOCS1    | POLR1C   | STMN1   | SLPI    | C3      | CYP17A1 |
| ACVR2A   | CCN2    | E2F1   | HDAC1  | KRT8   | MOCS2    | POMC     | SUOX    | WNT5A   | CACNA1B | CYP19A1 |
| ACVRL1   | CCND1   | E2F3   | HDAC2  | LAMA2  | MOV10    | PPARA    | SYP     | WT1     | CALB1   | CYP1A1  |
| ADA      | CCR1    | ECE1   | HDAC4  | LBR    | MPO      | PPARG    | TAC1    | XBP1    | CALCA   | CYP2B6  |
| ADAM10   | CCR3    | ECI2   | HEY2   | LCN2   | MRE11    | PPARGC1A | TCF4    | XDH     | ITGB1   | CYP2C19 |
| ADAM12   | CCR5    | EDN1   | HGF    | LDHA   | MRPL12   | PPIG     | TCF7L2  | XIAP    | GDNF    | IL10    |
| ADAMTS13 | CCR6    | EDN3   | HIGD1A | LEP    | MSH2     | PPP1R15A | TEAD1   | YY1     | GFAP    | IL13    |
| ADCY10   | CD163   | EDNRA  | HJV    | LEPR   | MT-ATP6  | PRDX1    | TERC    | ZEB1    | GFER    | IL15    |
| ADCYAP1  | CD34    | EGF    | HK1    | LGALS3 | MT-ATP8  | PRKCA    | TERT    | SMAD2   | GGT1    | IL17A   |
| ADIPOQ   | CD36    | EGFR   | HLA-A  | LIF    | MT-CO2   | PRKDC    | TET2    | MIR17   | GH1     | IL18    |

|         |         |         |          |             |         |         |          |          |        |          |
|---------|---------|---------|----------|-------------|---------|---------|----------|----------|--------|----------|
| ADK     | CD40    | EIF2AK3 | HLA-B    | LOC10272405 | MT-C03  | PRKN    | TF       | MIR181B1 | GHR    | IL18R1   |
| ADM     | CD44    | EIF2AK4 | HLA-DQB1 | LONP1       | MTDH    | PRL     | TFAM     | MIR185   | GHRL   | IL1A     |
| ADRB2   | CD46    | EIF2S1  | HLA-G    | LPL         | MTHFR   | PRNP    | TFB1M    | MIR191   | GJA1   | IL1B     |
| AFG3L2  | CD59    | ELANE   | HMGB1    | LRP1        | MT-ND1  | PROM1   | TFRC     | MIR193A  | GJB1   | IL1RN    |
| AFP     | CDC42   | EMD     | HMOX1    | LTF         | MT-ND3  | PSAP    | TGFA     | MIR195   | GJB2   | IL2      |
| AGER    | CDH1    | ENG     | HMOX2    | MADD        | MT-ND6  | PSEN1   | TGFB1    | MIR199A1 | GLS    | IL3      |
| AGT     | CDH2    | ENO1    | HNF1A    | MAG         | MTOR    | PTCD1   | TGFB2    | MIR200A  | GLUD1  | IL4      |
| AGTR1   | CDK1    | ENO2    | HNF4A    | MALAT1      | MTR     | PTEN    | TGFB3    | MIR200B  | GLUL   | IL6      |
| AGTR2   | CDK2    | ENPEP   | HOTAIR   | MAOA        | MTRR    | PTGDS   | TGFBR1   | MIR20A   | GNAS   | IL6R     |
| AHSP    | CDK4    | EP300   | HP       | MAP1B       | MT-TL1  | PTGS2   | TGFBR2   | SLC12A2  | GPC3   | AXIN2    |
| AIFM1   | CDK5    | EPRS1   | HPSE     | MAP2        | MYC     | PTK2    | TH       | SLC13A5  | NTRK2  | AZU1     |
| AKR1B1  | CDKN1A  | ERBB2   | HRAS     | MAP2K1      | NAGLU   | PTK2B   | THBD     | SLC17A5  | NTS    | BACE1    |
| AKT1    | CDKN2A  | ERCC6   | HRH1     | MAP2K4      | NCAM1   | PTPA    | THPO     | SLC1A1   | NUP153 | BAD      |
| ALB     | CDKN2B  | ERN1    | HSD11B2  | MAPK1       | NDE1    | PTPN11  | TIMP1    | SLC1A2   | OCN    | BAK1     |
| ALDH2   | CDKN3   | ESR1    | HSD17B10 | MAPK10      | NDUFA13 | PVALB   | TIMP2    | SLC1A3   | OLIG2  | BAX      |
| ALDH7A1 | CEACAM1 | ESRRG   | HSP90AA1 | MAPK14      | NDUFA6  | RAC1    | TJP1     | SLC1A4   | OLR1   | BCAP31   |
| ALDH9A1 | CES1    | EZH2    | HSPA1A   | MAPK3       | NDUFS4  | RAF1    | TKT      | SLC1A6   | OPRK1  | BCKDK    |
| ALOX5   | CFI     | EZR     | HSPA4    | MAPK8       | NEAT1   | RB1     | TLR3     | SLC22A5  | OPRM1  | BCL2     |
| ALPP    | CFLAR   | F10     | HSPA5    | MAPT        | NEFH    | RBPJ    | TLR4     | SLC25A24 | OXA1L  | BCL2L1   |
| ANGPT1  | CFTR    | F2      | HSPA8    | MB          | NES     | REN     | TLR7     | VCAM1    | OXT    | CSF2     |
| ANGPT2  | CGAS    | F3      | HSPB1    | MBL2        | NF1     | REST    | TMEM126B | VCL      | GAMT   | CSF3     |
| ANK2    | CGB3    | F5      | HSPD1    | MBP         | NFE2L2  | RETN    | TNF      | VCP      | GAPDH  | CTH      |
| ANK3    | CHAT    | F9      | HTR1A    | MCL1        | NFIA    | RHOA    | TNFRSF1A | VIM      | GAST   | CTLA4    |
| ANXA5   | CHKA    | FABP1   | HTR3A    | MDH1        | NFKB1   | RPS27A  | TNFRSF1B | VIP      | GATM   | CTNNB1   |
| AOX1    | CHRNA7  | FADD    | HTRA1    | MDK         | NFKBIA  | RPS6    | TNIP1    | VLDLR    | GBA    | CTSB     |
| APAF1   | CKB     | FAS     | HTRA2    | MDM2        | NGF     | RPS6KB1 | TNNT2    | VWF      | GC     | CTSD     |
| APC     | CLU     | FASLG   | HTT      | MEF2C       | NISCH   | RXRA    | TOMM20   | WARS1    | GCDH   | CTSG     |
| APOE    | COL4A1  | FECH    | ICAM1    | MEG3        | NLRP3   | RYR1    | TP53     | WDR83    | GCK    | CUL3     |
| APP     | COMT    | FGF13   | ID1      | MET         | NLRX1   | S100A1  | TPH1     | WNT1     | GCLC   | CXCL1    |
| AQP1    | COQ8B   | FGF2    | IDH1     | MFF         | NOS1    | S100A12 | TPI1     | UTS2     | GDF15  | SIRT3    |
| AQP4    | COX4I1  | FGFR1   | IDH2     | MFN2        | NOS3    | SAMHD1  | TPP1     | MIR143   | NPY    | SELPLG   |
| AR      | COX5A   | FLNA    | IDO1     | MIR124-1    | NOTCH1  | SCN1A   | TRAF6    | MIR144   | NQO1   | SERPINA1 |
| ARCN1   | CP      | FLT1    | IFNA1    | MIR125A     | NOTCH2  | SCN5A   | TREX1    | MIR145   | NR1H4  | SERPINA3 |

|        |        |        |         |          |        |       |        |         |       |          |
|--------|--------|--------|---------|----------|--------|-------|--------|---------|-------|----------|
| ARG1   | CPOX   | FMR1   | IFNA2   | MIR125B1 | NOTCH3 | SDHA  | TRPC6  | MIR146A | NR1I2 | SERPINC1 |
| ARG2   | CPT1A  | FN1    | IFNB1   | MIR126   | NOTCH4 | SDHB  | TRPV1  | MIR148A | NR2F2 | SERPINE1 |
| ARSA   | CPT2   | FOS    | IFNG    | MIR130A  | NPPA   | SELE  | TRPV3  | MIR148B | NR3C1 | SFRP1    |
| ASS1   | CRAT   | FOXM1  | IGF1    | MIR133A1 | NPPB   | SELL  | TSC2   | MIR150  | NRAS  | SGCB     |
| ATF4   | CREB1  | FOXO1  | IGF1R   | MIR140   | NPPC   | SELP  | TSP0   | MIR155  | NRP1  | SGK1     |
| ATF6   | CREBBP | FOXP3  | IGF2    | ATP5F1A  | CRP    | G6PC1 | TTN    | MIR15A  | NRP2  | SHC1     |
| ATP1A1 | CRH    | FST    | IGF2BP2 | ATP5F1E  | CRYAB  | G6PD  | TTR    | MIR15B  | NSF   | SIRT1    |
| ATP2A2 | CRHR1  | FXN    | IGF2R   | ATXN2    | CS     | GAB1  | TUBB3  | MIR16-1 | NTRK1 | UCP2     |
| IKBK   | IGFBP3 | IGFBP2 | IGFBP1  | AVP      | CSF1R  | GAD1  | TWIST1 | UCHL1   | UCN   | UCP3     |
| TYK2   | UQC    | RFS1   |         |          |        |       |        |         |       |          |

Supplementary Table 2: Therapeutic targets of vitamin C

| Gene    | Gene  | Gene    | Gene  | Gene  | Gene  | Gene    | Gene   | Gene   | Gene   | Gene  |
|---------|-------|---------|-------|-------|-------|---------|--------|--------|--------|-------|
| VAV1    | PTPN2 | CXCR1   | PDCD4 | KDM5D | GSK3B | PAM     | ALOX5  | OGFOD1 | DUSP3  | EGLN2 |
| TTL     | PTPN1 | CDC25B  | KDM6B | PLOD1 | FOLH1 | P3H1    | CASP1  | OGFOD2 | ABCB1  | EGLN3 |
| TRPV4   | PTGS2 | CA9     | KDM5C | TMLHE | F2RL1 | P3H2    | HSPA5  | ALKBH2 | PTGS1  | HIF1A |
| TERT    | PRKCQ | CA2     | KDM3A | P4HTM | EGLN2 | P3H3    | NDUFV1 | ALKBH3 | PTGS2  | PGR   |
| STAT3   | PRKCH | CA1     | KCNA3 | EGLN1 | EGLN1 | P4HA1   | MT-ND1 | PRKCA  | GABRA1 | PDE4D |
| RPS6KA5 | PRKCG | ATP6AP1 | JUN   | GRIA2 | PRKCB | AR      | PHYH   | PRKCB  | PRKCA  | DBH   |
| RORC    | PRKCE | ATP2A1  | IARS  | DNA   | PRKCA | ACP1    | PLOD3  |        |        |       |
| LCT     | PRKCD | ATP1A1  | GSTM1 | PLOD2 | PPARG | NDUFA11 | BBOX1  |        |        |       |

Supplementary Table 3: GO Biological Processes

| ID         | Description                                                         | BgRatio   | pvalue   | p.adjust   | geneID                        | Count |
|------------|---------------------------------------------------------------------|-----------|----------|------------|-------------------------------|-------|
| GO:1902895 | positive regulation of pri-miRNA transcription by RNA polymerase II | 40/18866  | 6.03E-10 | 7.34E-07   | HIF1A/JUN/PPARG/STAT3         | 4     |
| GO:1902893 | regulation of pri-miRNA transcription by RNA polymerase II          | 51/18866  | 1.65E-09 | 7.82E-07   | HIF1A/JUN/PPARG/STAT3         | 4     |
| GO:0061614 | pri-miRNA transcription by RNA polymerase II                        | 53/18866  | 1.93E-09 | 7.82E-07   | HIF1A/JUN/PPARG/STAT3         | 4     |
| GO:0062013 | positive regulation of small molecule metabolic process             | 154/18866 | 1.47E-07 | 3.96E-05   | HIF1A/PPARG/PTGS2/STAT3       | 4     |
| GO:0062012 | regulation of small molecule metabolic process                      | 456/18866 | 1.63E-07 | 3.96E-05   | GSK3B/HIF1A/PPARG/PTGS2/STAT3 | 5     |
| GO:0001936 | regulation of endothelial cell proliferation                        | 184/18866 | 3.00E-07 | 6.07E-05   | HIF1A/JUN/PPARG/STAT3         | 4     |
| GO:0001935 | endothelial cell proliferation                                      | 199/18866 | 4.10E-07 | 7.12E-05   | HIF1A/JUN/PPARG/STAT3         | 4     |
| GO:0009612 | response to mechanical stimulus                                     | 209/18866 | 4.99E-07 | 7.14E-05   | CASP1/JUN/PPARG/PTGS2         | 4     |
| GO:1901215 | negative regulation of neuron death                                 | 212/18866 | 5.28E-07 | 7.14E-05   | GSK3B/HIF1A/JUN/STAT3         | 4     |
| GO:0033002 | muscle cell proliferation                                           | 244/18866 | 9.27E-07 | 0.0001127  | JUN/PPARG/PTGS2/STAT3         | 4     |
| GO:0010632 | regulation of epithelial cell migration                             | 301/18866 | 2.14E-06 | 0.00023664 | HIF1A/JUN/PPARG/PTGS2         | 4     |
| GO:1901214 | regulation of neuron death                                          | 321/18866 | 2.77E-06 | 0.00027506 | GSK3B/HIF1A/JUN/STAT3         | 4     |
| GO:0071496 | cellular response to external stimulus                              | 326/18866 | 2.94E-06 | 0.00027506 | CASP1/JUN/PPARG/PTGS2         | 4     |
| GO:0062197 | cellular response to chemical stress                                | 360/18866 | 4.36E-06 | 0.00031202 | HIF1A/JUN/PPARG/PTGS2         | 4     |
| GO:0070997 | neuron death                                                        | 360/18866 | 4.36E-06 | 0.00031202 | GSK3B/HIF1A/JUN/STAT3         | 4     |
| GO:0010631 | epithelial cell migration                                           | 365/18866 | 4.61E-06 | 0.00031202 | HIF1A/JUN/PPARG/PTGS2         | 4     |
| GO:0090132 | epithelium migration                                                | 368/18866 | 4.76E-06 | 0.00031202 | HIF1A/JUN/PPARG/PTGS2         | 4     |
| GO:0045862 | positive regulation of proteolysis                                  | 370/18866 | 4.86E-06 | 0.00031202 | CASP1/GSK3B/PPARG/STAT3       | 4     |
| GO:0090130 | tissue migration                                                    | 374/18866 | 5.07E-06 | 0.00031202 | HIF1A/JUN/PPARG/PTGS2         | 4     |

|            |                                                              |           |          |            |                         |   |
|------------|--------------------------------------------------------------|-----------|----------|------------|-------------------------|---|
| G0:0045639 | positive regulation of myeloid cell differentiation          | 101/18866 | 5.13E-06 | 0.00031202 | HIF1A/JUN/STAT3         | 3 |
| G0:0050678 | regulation of epithelial cell proliferation                  | 395/18866 | 6.30E-06 | 0.00036075 | HIF1A/JUN/PPARG/STAT3   | 4 |
| G0:0002526 | acute inflammatory response                                  | 111/18866 | 6.82E-06 | 0.00036075 | PPARG/PTGS2/STAT3       | 3 |
| G0:0045765 | regulation of angiogenesis                                   | 403/18866 | 6.82E-06 | 0.00036075 | HIF1A/PPARG/PTGS2/STAT3 | 4 |
| G0:0001938 | positive regulation of endothelial cell proliferation        | 113/18866 | 7.20E-06 | 0.00036461 | HIF1A/JUN/STAT3         | 3 |
| G0:0050727 | regulation of inflammatory response                          | 425/18866 | 8.42E-06 | 0.00040967 | CASP1/PPARG/PTGS2/STAT3 | 4 |
| G0:0030099 | myeloid cell differentiation                                 | 431/18866 | 8.90E-06 | 0.00041213 | HIF1A/JUN/PPARG/STAT3   | 4 |
| G0:0052548 | regulation of endopeptidase activity                         | 434/18866 | 9.15E-06 | 0.00041213 | CASP1/PPARG/PTGS2/STAT3 | 4 |
| G0:1901342 | regulation of vasculature development                        | 444/18866 | 1.00E-05 | 0.00041686 | HIF1A/PPARG/PTGS2/STAT3 | 4 |
| G0:0001819 | positive regulation of cytokine production                   | 447/18866 | 1.03E-05 | 0.00041686 | CASP1/HIF1A/PTGS2/STAT3 | 4 |
| G0:0043434 | response to peptide hormone                                  | 447/18866 | 1.03E-05 | 0.00041686 | GSK3B/PPARG/PTGS2/STAT3 | 4 |
| G0:0050673 | epithelial cell proliferation                                | 453/18866 | 1.08E-05 | 0.00042526 | HIF1A/JUN/PPARG/STAT3   | 4 |
| G0:0052547 | regulation of peptidase activity                             | 466/18866 | 1.21E-05 | 0.00046073 | CASP1/PPARG/PTGS2/STAT3 | 4 |
| G0:0001667 | ameboidal-type cell migration                                | 481/18866 | 1.37E-05 | 0.00050635 | HIF1A/JUN/PPARG/PTGS2   | 4 |
| G0:0007612 | learning                                                     | 145/18866 | 1.52E-05 | 0.00054424 | HIF1A/JUN/PTGS2         | 3 |
| G0:0001890 | placenta development                                         | 156/18866 | 1.89E-05 | 0.00065818 | HIF1A/PPARG/PTGS2       | 3 |
| G0:0043467 | regulation of generation of precursor metabolites and energy | 162/18866 | 2.12E-05 | 0.00071521 | GSK3B/HIF1A/STAT3       | 3 |
| G0:0043535 | regulation of blood vessel endothelial cell migration        | 164/18866 | 2.20E-05 | 0.00071521 | HIF1A/PPARG/PTGS2       | 3 |
| G0:0060965 | negative regulation of gene silencing by miRNA               | 20/18866  | 2.24E-05 | 0.00071521 | PPARG/STAT3             | 2 |
| G0:0048660 | regulation of smooth muscle cell proliferation               | 173/18866 | 2.58E-05 | 0.00080494 | JUN/PPARG/PTGS2         | 3 |

|            |                                                                      |           |          |            |                   |   |
|------------|----------------------------------------------------------------------|-----------|----------|------------|-------------------|---|
| G0:0048659 | smooth muscle cell proliferation                                     | 175/18866 | 2.67E-05 | 0.00080605 | JUN/PPARG/PTGS2   | 3 |
| G0:0010634 | positive regulation of epithelial cell migration                     | 176/18866 | 2.72E-05 | 0.00080605 | HIF1A/JUN/PTGS2   | 3 |
| G0:0010950 | positive regulation of endopeptidase activity                        | 181/18866 | 2.96E-05 | 0.00082206 | CASP1/PPARG/STAT3 | 3 |
| G0:0060149 | negative regulation of posttranscriptional gene silencing            | 23/18866  | 2.97E-05 | 0.00082206 | PPARG/STAT3       | 2 |
| G0:0060967 | negative regulation of gene silencing by RNA                         | 23/18866  | 2.97E-05 | 0.00082206 | PPARG/STAT3       | 2 |
| G0:0001959 | regulation of cytokine-mediated signaling pathway                    | 183/18866 | 3.05E-05 | 0.00082518 | CASP1/HIF1A/PPARG | 3 |
| G0:0010869 | regulation of receptor biosynthetic process                          | 24/18866  | 3.24E-05 | 0.00085765 | HIF1A/PPARG       | 2 |
| G0:0043534 | blood vessel endothelial cell migration                              | 189/18866 | 3.36E-05 | 0.00086998 | HIF1A/PPARG/PTGS2 | 3 |
| G0:0060759 | regulation of response to cytokine stimulus                          | 196/18866 | 3.75E-05 | 0.00094953 | CASP1/HIF1A/PPARG | 3 |
| G0:2000377 | regulation of reactive oxygen species metabolic process              | 200/18866 | 3.98E-05 | 0.0009827  | HIF1A/PTGS2/STAT3 | 3 |
| G0:0010952 | positive regulation of peptidase activity                            | 201/18866 | 4.04E-05 | 0.0009827  | CASP1/PPARG/STAT3 | 3 |
| G0:1903708 | positive regulation of hemopoiesis                                   | 204/18866 | 4.22E-05 | 0.00100696 | HIF1A/JUN/STAT3   | 3 |
| G0:0010575 | positive regulation of vascular endothelial growth factor production | 28/18866  | 4.44E-05 | 0.0010077  | HIF1A/PTGS2       | 2 |
| G0:0032800 | receptor biosynthetic process                                        | 28/18866  | 4.44E-05 | 0.0010077  | HIF1A/PPARG       | 2 |
| G0:0045766 | positive regulation of angiogenesis                                  | 208/18866 | 4.47E-05 | 0.0010077  | HIF1A/PTGS2/STAT3 | 3 |
| G0:0006109 | regulation of carbohydrate metabolic process                         | 210/18866 | 4.60E-05 | 0.00101409 | GSK3B/HIF1A/STAT3 | 3 |

|            |                                                                                  |           |          |            |                   |   |
|------------|----------------------------------------------------------------------------------|-----------|----------|------------|-------------------|---|
| G0:0050679 | positive regulation of epithelial cell proliferation                             | 211/18866 | 4.67E-05 | 0.00101409 | HIF1A/JUN/STAT3   | 3 |
| G0:0043281 | regulation of cysteine-type endopeptidase activity involved in apoptotic process | 215/18866 | 4.94E-05 | 0.00105365 | CASP1/PPARG/PTGS2 | 3 |
| G0:0007623 | circadian rhythm                                                                 | 218/18866 | 5.15E-05 | 0.00107912 | GSK3B/JUN/PPARG   | 3 |
| G0:0009266 | response to temperature stimulus                                                 | 233/18866 | 6.27E-05 | 0.00126239 | GSK3B/PPARG/PTGS2 | 3 |
| G0:2001234 | negative regulation of apoptotic signaling pathway                               | 233/18866 | 6.27E-05 | 0.00126239 | GSK3B/HIF1A/PTGS2 | 3 |
| G0:0071453 | cellular response to oxygen levels                                               | 235/18866 | 6.44E-05 | 0.00126239 | HIF1A/PPARG/PTGS2 | 3 |
| G0:1904018 | positive regulation of vasculature development                                   | 235/18866 | 6.44E-05 | 0.00126239 | HIF1A/PTGS2/STAT3 | 3 |
| G0:0045648 | positive regulation of erythrocyte differentiation                               | 34/18866  | 6.58E-05 | 0.00126613 | HIF1A/STAT3       | 2 |
| G0:0010594 | regulation of endothelial cell migration                                         | 238/18866 | 6.68E-05 | 0.00126613 | HIF1A/PPARG/PTGS2 | 3 |
| G0:2000116 | regulation of cysteine-type endopeptidase activity                               | 239/18866 | 6.77E-05 | 0.00126613 | CASP1/PPARG/PTGS2 | 3 |
| G0:0042593 | glucose homeostasis                                                              | 245/18866 | 7.29E-05 | 0.0013215  | HIF1A/PPARG/STAT3 | 3 |
| G0:0033500 | carbohydrate homeostasis                                                         | 246/18866 | 7.37E-05 | 0.0013215  | HIF1A/PPARG/STAT3 | 3 |
| G0:0071634 | regulation of transforming growth factor beta production                         | 36/18866  | 7.39E-05 | 0.0013215  | HIF1A/PTGS2       | 2 |
| G0:0060969 | negative regulation of gene silencing                                            | 37/18866  | 7.81E-05 | 0.00135458 | PPARG/STAT3       | 2 |
| G0:0071542 | dopaminergic neuron differentiation                                              | 37/18866  | 7.81E-05 | 0.00135458 | GSK3B/HIF1A       | 2 |
| G0:0030224 | monocyte differentiation                                                         | 38/18866  | 8.24E-05 | 0.00135458 | JUN/PPARG         | 2 |
| G0:0045923 | positive regulation of fatty acid metabolic process                              | 38/18866  | 8.24E-05 | 0.00135458 | PPARG/PTGS2       | 2 |
| G0:0071604 | transforming growth factor beta production                                       | 38/18866  | 8.24E-05 | 0.00135458 | HIF1A/PTGS2       | 2 |

|            |                                                                |           |             |            |                   |   |
|------------|----------------------------------------------------------------|-----------|-------------|------------|-------------------|---|
| G0:1903131 | mononuclear cell differentiation                               | 38/18866  | 8.24E-05    | 0.00135458 | JUN/PPARG         | 2 |
| G0:0007611 | learning or memory                                             | 260/18866 | 8.69E-05    | 0.00140941 | HIF1A/JUN/PTGS2   | 3 |
| G0:0045637 | regulation of myeloid cell differentiation                     | 263/18866 | 8.99E-05    | 0.00143907 | HIF1A/JUN/STAT3   | 3 |
| G0:0034504 | protein localization to nucleus                                | 277/18866 | 0.000104908 | 0.00165673 | GSK3B/PTGS2/STAT3 | 3 |
| G0:0043542 | endothelial cell migration                                     | 286/18866 | 0.000115343 | 0.00178465 | HIF1A/PPARG/PTGS2 | 3 |
| G0:0010677 | negative regulation of cellular carbohydrate metabolic process | 45/18866  | 0.000115944 | 0.00178465 | GSK3B/STAT3       | 2 |
| G0:0072593 | reactive oxygen species metabolic process                      | 288/18866 | 0.00011775  | 0.00178981 | HIF1A/PTGS2/STAT3 | 3 |
| G0:0006953 | acute-phase response                                           | 47/18866  | 0.000126556 | 0.00189991 | PTGS2/STAT3       | 2 |
| G0:0050890 | cognition                                                      | 302/18866 | 0.000135532 | 0.00191538 | HIF1A/JUN/PTGS2   | 3 |
| G0:0002673 | regulation of acute inflammatory response                      | 49/18866  | 0.000137629 | 0.00191538 | PPARG/PTGS2       | 2 |
| G0:0048511 | rhythmic process                                               | 305/18866 | 0.000139557 | 0.00191538 | GSK3B/JUN/PPARG   | 3 |
| G0:0001961 | positive regulation of cytokine-mediated signaling pathway     | 50/18866  | 0.000143339 | 0.00191538 | CASP1/HIF1A       | 2 |
| G0:0045646 | regulation of erythrocyte differentiation                      | 50/18866  | 0.000143339 | 0.00191538 | HIF1A/STAT3       | 2 |
| G0:0045981 | positive regulation of nucleotide metabolic process            | 50/18866  | 0.000143339 | 0.00191538 | HIF1A/STAT3       | 2 |
| G0:0101023 | vascular endothelial cell proliferation                        | 50/18866  | 0.000143339 | 0.00191538 | PPARG/STAT3       | 2 |
| G0:1900544 | positive regulation of purine nucleotide metabolic process     | 50/18866  | 0.000143339 | 0.00191538 | HIF1A/STAT3       | 2 |
| G0:1903580 | positive regulation of ATP metabolic process                   | 50/18866  | 0.000143339 | 0.00191538 | HIF1A/STAT3       | 2 |
| G0:1905562 | regulation of vascular endothelial cell proliferation          | 50/18866  | 0.000143339 | 0.00191538 | PPARG/STAT3       | 2 |



|            |                                                                  |           |             |            |                   |   |
|------------|------------------------------------------------------------------|-----------|-------------|------------|-------------------|---|
| G0:0045912 | negative regulation of carbohydrate metabolic process            | 51/18866  | 0.000149163 | 0.00197154 | GSK3B/STAT3       | 2 |
| G0:0007568 | aging                                                            | 319/18866 | 0.000159381 | 0.00208395 | JUN/PTGS2/STAT3   | 3 |
| G0:0032731 | positive regulation of interleukin-1 beta production             | 53/18866  | 0.000161156 | 0.00208474 | CASP1/STAT3       | 2 |
| G0:0071375 | cellular response to peptide hormone stimulus                    | 330/18866 | 0.000176188 | 0.0022552  | GSK3B/PPARG/STAT3 | 3 |
| G0:0060760 | positive regulation of response to cytokine stimulus             | 57/18866  | 0.000186519 | 0.00236257 | CASP1/HIF1A       | 2 |
| G0:0010506 | regulation of autophagy                                          | 347/18866 | 0.000204376 | 0.00256207 | GSK3B/HIF1A/STAT3 | 3 |
| G0:0032732 | positive regulation of interleukin-1 production                  | 60/18866  | 0.000206744 | 0.00256531 | CASP1/STAT3       | 2 |
| G0:0010574 | regulation of vascular endothelial growth factor production      | 61/18866  | 0.000213714 | 0.00261005 | HIF1A/PTGS2       | 2 |
| G0:0006913 | nucleocytoplasmic transport                                      | 354/18866 | 0.000216789 | 0.00261005 | GSK3B/PTGS2/STAT3 | 3 |
| G0:0051222 | positive regulation of protein transport                         | 354/18866 | 0.000216789 | 0.00261005 | GSK3B/HIF1A/PTGS2 | 3 |
| G0:0051169 | nuclear transport                                                | 357/18866 | 0.000222256 | 0.00264964 | GSK3B/PTGS2/STAT3 | 3 |
| G0:0002066 | columnar/cuboidal epithelial cell development                    | 64/18866  | 0.000235311 | 0.00277804 | GSK3B/HIF1A       | 2 |
| G0:0010038 | response to metal ion                                            | 366/18866 | 0.000239196 | 0.00278462 | HIF1A/JUN/PTGS2   | 3 |
| G0:0051098 | regulation of binding                                            | 367/18866 | 0.000241128 | 0.00278462 | GSK3B/JUN/PPARG   | 3 |
| G0:0010573 | vascular endothelial growth factor production                    | 65/18866  | 0.000242738 | 0.00278462 | HIF1A/PTGS2       | 2 |
| G0:1904951 | positive regulation of establishment of protein localization     | 370/18866 | 0.000246987 | 0.00279211 | GSK3B/HIF1A/PTGS2 | 3 |
| G0:0046824 | positive regulation of nucleocytoplasmic transport               | 66/18866  | 0.00025028  | 0.00279211 | GSK3B/PTGS2       | 2 |
| G0:2000378 | negative regulation of reactive oxygen species metabolic process | 66/18866  | 0.00025028  | 0.00279211 | HIF1A/STAT3       | 2 |

|            |                                                                    |           |             |            |                   |   |
|------------|--------------------------------------------------------------------|-----------|-------------|------------|-------------------|---|
| G0:0001654 | eye development                                                    | 384/18866 | 0.000275558 | 0.00304617 | HIF1A/JUN/STAT3   | 3 |
| G0:0150063 | visual system development                                          | 388/18866 | 0.000284099 | 0.00311229 | HIF1A/JUN/STAT3   | 3 |
| G0:0048880 | sensory system development                                         | 394/18866 | 0.000297232 | 0.00320592 | HIF1A/JUN/STAT3   | 3 |
| G0:0045600 | positive regulation of fat cell differentiation                    | 72/18866  | 0.000297919 | 0.00320592 | PPARG/PTGS2       | 2 |
| G0:0070482 | response to oxygen levels                                          | 396/18866 | 0.000301696 | 0.00320985 | HIF1A/PPARG/PTGS2 | 3 |
| G0:0042493 | response to drug                                                   | 397/18866 | 0.000303944 | 0.00320985 | PPARG/PTGS2/STAT3 | 3 |
| G0:1901653 | cellular response to peptide                                       | 398/18866 | 0.000306203 | 0.00320985 | GSK3B/PPARG/STAT3 | 3 |
| G0:0046902 | regulation of mitochondrial membrane permeability                  | 77/18866  | 0.000340743 | 0.00348873 | GSK3B/STAT3       | 2 |
| G0:0150076 | neuroinflammatory response                                         | 77/18866  | 0.000340743 | 0.00348873 | JUN/PTGS2         | 2 |
| G0:2001233 | regulation of apoptotic signaling pathway                          | 413/18866 | 0.000341413 | 0.00348873 | GSK3B/HIF1A/PTGS2 | 3 |
| G0:0043536 | positive regulation of blood vessel endothelial cell migration     | 79/18866  | 0.000358666 | 0.00360445 | HIF1A/PTGS2       | 2 |
| G0:0071260 | cellular response to mechanical stimulus                           | 79/18866  | 0.000358666 | 0.00360445 | CASP1/PTGS2       | 2 |
| G0:0003151 | outflow tract morphogenesis                                        | 80/18866  | 0.000367798 | 0.00363612 | HIF1A/JUN         | 2 |
| G0:0006110 | regulation of glycolytic process                                   | 80/18866  | 0.000367798 | 0.00363612 | HIF1A/STAT3       | 2 |
| G0:0048145 | regulation of fibroblast proliferation                             | 83/18866  | 0.000395871 | 0.00388209 | JUN/PPARG         | 2 |
| G0:0048144 | fibroblast proliferation                                           | 84/18866  | 0.000405455 | 0.00394426 | JUN/PPARG         | 2 |
| G0:0048608 | reproductive structure development                                 | 443/18866 | 0.000419523 | 0.00404873 | HIF1A/PPARG/PTGS2 | 3 |
| G0:0061458 | reproductive system development                                    | 447/18866 | 0.000430738 | 0.00409936 | HIF1A/PPARG/PTGS2 | 3 |
| G0:1904705 | regulation of vascular associated smooth muscle cell proliferation | 87/18866  | 0.000434883 | 0.00409936 | JUN/PPARG         | 2 |
| G0:1990874 | vascular associated smooth muscle cell proliferation               | 87/18866  | 0.000434883 | 0.00409936 | JUN/PPARG         | 2 |

|            |                                                                                   |           |             |            |                   |   |
|------------|-----------------------------------------------------------------------------------|-----------|-------------|------------|-------------------|---|
| G0:0090559 | regulation of membrane permeability                                               | 88/18866  | 0.000444917 | 0.00414856 | GSK3B/STAT3       | 2 |
| G0:0050804 | modulation of chemical synaptic transmission                                      | 454/18866 | 0.00045083  | 0.00414856 | GSK3B/PTGS2/STAT3 | 3 |
| G0:0051090 | regulation of DNA-binding transcription factor activity                           | 455/18866 | 0.000453749 | 0.00414856 | JUN/PPARG/STAT3   | 3 |
| G0:0099177 | regulation of trans-synaptic signaling                                            | 455/18866 | 0.000453749 | 0.00414856 | GSK3B/PTGS2/STAT3 | 3 |
| G0:0006979 | response to oxidative stress                                                      | 458/18866 | 0.000462579 | 0.00416055 | HIF1A/JUN/PTGS2   | 3 |
| G0:0043470 | regulation of carbohydrate catabolic process                                      | 90/18866  | 0.000465325 | 0.00416055 | HIF1A/STAT3       | 2 |
| G0:0070542 | response to fatty acid                                                            | 90/18866  | 0.000465325 | 0.00416055 | PPARG/PTGS2       | 2 |
| G0:0033273 | response to vitamin                                                               | 91/18866  | 0.000475697 | 0.00422225 | PPARG/PTGS2       | 2 |
| G0:0031667 | response to nutrient levels                                                       | 473/18866 | 0.000508408 | 0.00447988 | JUN/PPARG/PTGS2   | 3 |
| G0:0032651 | regulation of interleukin-1 beta production                                       | 97/18866  | 0.000540292 | 0.00469282 | CASP1/STAT3       | 2 |
| G0:1901216 | positive regulation of neuron death                                               | 97/18866  | 0.000540292 | 0.00469282 | GSK3B/JUN         | 2 |
| G0:2001243 | negative regulation of intrinsic apoptotic signaling pathway                      | 98/18866  | 0.00055145  | 0.00475577 | HIF1A/PTGS2       | 2 |
| G0:0019217 | regulation of fatty acid metabolic process                                        | 101/18866 | 0.000585598 | 0.0050147  | PPARG/PTGS2       | 2 |
| G0:1903706 | regulation of hemopoiesis                                                         | 498/18866 | 0.000591156 | 0.00502689 | HIF1A/JUN/STAT3   | 3 |
| G0:0048661 | positive regulation of smooth muscle cell proliferation                           | 103/18866 | 0.000608922 | 0.00514201 | JUN/PTGS2         | 2 |
| G0:0032611 | interleukin-1 beta production                                                     | 106/18866 | 0.000644746 | 0.00540698 | CASP1/STAT3       | 2 |
| G0:1903426 | regulation of reactive oxygen species biosynthetic process                        | 107/18866 | 0.000656911 | 0.00547126 | PTGS2/STAT3       | 2 |
| G0:0043618 | regulation of transcription from RNA polymerase II promoter in response to stress | 109/18866 | 0.000681574 | 0.00563806 | HIF1A/JUN         | 2 |

|            |                                                                 |           |             |            |             |   |
|------------|-----------------------------------------------------------------|-----------|-------------|------------|-------------|---|
| G0:0032652 | regulation of interleukin-1 production                          | 111/18866 | 0.000706683 | 0.00580626 | CASP1/STAT3 | 2 |
| G0:0046822 | regulation of nucleocytoplasmic transport                       | 112/18866 | 0.000719405 | 0.00587112 | GSK3B/PTGS2 | 2 |
| G0:0032963 | collagen metabolic process                                      | 113/18866 | 0.000732237 | 0.005936   | HIF1A/PPARG | 2 |
| G0:0006096 | glycolytic process                                              | 115/18866 | 0.000758236 | 0.00606589 | HIF1A/STAT3 | 2 |
| G0:0043620 | regulation of DNA-templated transcription in response to stress | 115/18866 | 0.000758236 | 0.00606589 | HIF1A/JUN   | 2 |
| G0:0006757 | ATP generation from ADP                                         | 116/18866 | 0.000771402 | 0.00609107 | HIF1A/STAT3 | 2 |
| G0:0060964 | regulation of gene silencing by miRNA                           | 116/18866 | 0.000771402 | 0.00609107 | PPARG/STAT3 | 2 |
| G0:0030282 | bone mineralization                                             | 117/18866 | 0.000784678 | 0.00615593 | HIF1A/PTGS2 | 2 |
| G0:0021987 | cerebral cortex development                                     | 118/18866 | 0.000798066 | 0.00622082 | GSK3B/HIF1A | 2 |
| G0:0010822 | positive regulation of mitochondrion organization               | 119/18866 | 0.000811564 | 0.00625825 | GSK3B/HIF1A | 2 |
| G0:0060147 | regulation of posttranscriptional gene silencing                | 120/18866 | 0.000825173 | 0.00625825 | PPARG/STAT3 | 2 |
| G0:0060966 | regulation of gene silencing by RNA                             | 120/18866 | 0.000825173 | 0.00625825 | PPARG/STAT3 | 2 |
| G0:0002065 | columnar/cuboidal epithelial cell differentiation               | 121/18866 | 0.000838893 | 0.00625825 | GSK3B/HIF1A | 2 |
| G0:0030218 | erythrocyte differentiation                                     | 121/18866 | 0.000838893 | 0.00625825 | HIF1A/STAT3 | 2 |
| G0:0032612 | interleukin-1 production                                        | 121/18866 | 0.000838893 | 0.00625825 | CASP1/STAT3 | 2 |
| G0:1900542 | regulation of purine nucleotide metabolic process               | 121/18866 | 0.000838893 | 0.00625825 | HIF1A/STAT3 | 2 |
| G0:0042752 | regulation of circadian rhythm                                  | 122/18866 | 0.000852724 | 0.00632264 | GSK3B/PPARG | 2 |
| G0:0006140 | regulation of nucleotide metabolic process                      | 123/18866 | 0.000866665 | 0.00638706 | HIF1A/STAT3 | 2 |
| G0:0046031 | ADP metabolic process                                           | 124/18866 | 0.000880717 | 0.00640102 | HIF1A/STAT3 | 2 |
| G0:0051101 | regulation of DNA binding                                       | 124/18866 | 0.000880717 | 0.00640102 | JUN/PPARG   | 2 |

|            |                                                                                           |           |             |            |             |   |
|------------|-------------------------------------------------------------------------------------------|-----------|-------------|------------|-------------|---|
| G0:0008637 | apoptotic mitochondrial changes                                                           | 125/18866 | 0.000894879 | 0.00640102 | GSK3B/JUN   | 2 |
| G0:0034605 | cellular response to heat                                                                 | 125/18866 | 0.000894879 | 0.00640102 | GSK3B/PTGS2 | 2 |
| G0:1903578 | regulation of ATP metabolic process                                                       | 125/18866 | 0.000894879 | 0.00640102 | HIF1A/STAT3 | 2 |
| G0:1900180 | regulation of protein localization to nucleus                                             | 127/18866 | 0.000923534 | 0.00656735 | GSK3B/PTGS2 | 2 |
| G0:1903409 | reactive oxygen species biosynthetic process                                              | 128/18866 | 0.000938027 | 0.00663163 | PTGS2/STAT3 | 2 |
| G0:0034101 | erythrocyte homeostasis                                                                   | 129/18866 | 0.000952631 | 0.00669595 | HIF1A/STAT3 | 2 |
| G0:0010508 | positive regulation of autophagy                                                          | 131/18866 | 0.000982168 | 0.00686389 | GSK3B/HIF1A | 2 |
| G0:0010595 | positive regulation of endothelial cell migration                                         | 132/18866 | 0.000997101 | 0.00692843 | HIF1A/PTGS2 | 2 |
| G0:0006165 | nucleoside diphosphate phosphorylation                                                    | 133/18866 | 0.001012145 | 0.006993   | HIF1A/STAT3 | 2 |
| G0:0043280 | positive regulation of cysteine-type endopeptidase activity involved in apoptotic process | 134/18866 | 0.001027299 | 0.0070576  | CASP1/PPARG | 2 |
| G0:0046939 | nucleotide phosphorylation                                                                | 135/18866 | 0.001042562 | 0.00712222 | HIF1A/STAT3 | 2 |
| G0:0009135 | purine nucleoside diphosphate metabolic process                                           | 136/18866 | 0.001057935 | 0.00714694 | HIF1A/STAT3 | 2 |
| G0:0009179 | purine ribonucleoside diphosphate metabolic process                                       | 136/18866 | 0.001057935 | 0.00714694 | HIF1A/STAT3 | 2 |
| G0:0009185 | ribonucleoside diphosphate metabolic process                                              | 139/18866 | 0.001104713 | 0.00742172 | HIF1A/STAT3 | 2 |
| G0:0060968 | regulation of gene silencing                                                              | 140/18866 | 0.001120525 | 0.00748658 | PPARG/STAT3 | 2 |
| G0:0032355 | response to estradiol                                                                     | 141/18866 | 0.001136446 | 0.00755147 | PTGS2/STAT3 | 2 |
| G0:0007006 | mitochondrial membrane organization                                                       | 142/18866 | 0.001152477 | 0.00761637 | GSK3B/STAT3 | 2 |
| G0:0045598 | regulation of fat cell differentiation                                                    | 143/18866 | 0.001168617 | 0.00768129 | PPARG/PTGS2 | 2 |

|            |                                                             |           |             |            |             |   |
|------------|-------------------------------------------------------------|-----------|-------------|------------|-------------|---|
| G0:0010675 | regulation of cellular carbohydrate metabolic process       | 148/18866 | 0.001250956 | 0.0081783  | GSK3B/STAT3 | 2 |
| G0:0014074 | response to purine-containing compound                      | 149/18866 | 0.001267752 | 0.00819993 | PPARG/PTGS2 | 2 |
| G0:0043524 | negative regulation of neuron apoptotic process             | 149/18866 | 0.001267752 | 0.00819993 | HIF1A/JUN   | 2 |
| G0:0006606 | protein import into nucleus                                 | 150/18866 | 0.001284656 | 0.0082653  | PTGS2/STAT3 | 2 |
| G0:2001056 | positive regulation of cysteine-type endopeptidase activity | 151/18866 | 0.001301669 | 0.00833068 | CASP1/PPARG | 2 |
| G0:0001837 | epithelial to mesenchymal transition                        | 152/18866 | 0.001318791 | 0.00835234 | GSK3B/HIF1A | 2 |
| G0:0006090 | pyruvate metabolic process                                  | 152/18866 | 0.001318791 | 0.00835234 | HIF1A/STAT3 | 2 |
| G0:0045834 | positive regulation of lipid metabolic process              | 153/18866 | 0.001336021 | 0.00841763 | PPARG/PTGS2 | 2 |
| G0:0002262 | myeloid cell homeostasis                                    | 154/18866 | 0.001353361 | 0.00848292 | HIF1A/STAT3 | 2 |
| G0:0009132 | nucleoside diphosphate metabolic process                    | 155/18866 | 0.001370809 | 0.00854822 | HIF1A/STAT3 | 2 |
| G0:0048592 | eye morphogenesis                                           | 156/18866 | 0.001388366 | 0.00861353 | HIF1A/STAT3 | 2 |
| G0:0050729 | positive regulation of inflammatory response                | 158/18866 | 0.001423805 | 0.00878856 | PTGS2/STAT3 | 2 |
| G0:0031214 | biomineral tissue development                               | 163/18866 | 0.001514298 | 0.0092532  | HIF1A/PTGS2 | 2 |
| G0:0110148 | biomineralization                                           | 163/18866 | 0.001514298 | 0.0092532  | HIF1A/PTGS2 | 2 |
| G0:0009408 | response to heat                                            | 166/18866 | 0.001569893 | 0.00949746 | GSK3B/PTGS2 | 2 |
| G0:2001242 | regulation of intrinsic apoptotic signaling pathway         | 166/18866 | 0.001569893 | 0.00949746 | HIF1A/PTGS2 | 2 |
| G0:0051100 | negative regulation of binding                              | 169/18866 | 0.001626459 | 0.00979096 | GSK3B/JUN   | 2 |
| G0:0007584 | response to nutrient                                        | 171/18866 | 0.001664708 | 0.00992297 | PPARG/PTGS2 | 2 |
| G0:0051170 | import into nucleus                                         | 171/18866 | 0.001664708 | 0.00992297 | PTGS2/STAT3 | 2 |
| G0:0050806 | positive regulation of synaptic transmission                | 172/18866 | 0.001683994 | 0.00998896 | GSK3B/PTGS2 | 2 |
| G0:0021543 | pallium development                                         | 173/18866 | 0.001703388 | 0.01005495 | GSK3B/HIF1A | 2 |
| G0:0001659 | temperature homeostasis                                     | 174/18866 | 0.00172289  | 0.01007228 | PTGS2/STAT3 | 2 |

|            |                                                        |           |             |            |             |   |
|------------|--------------------------------------------------------|-----------|-------------|------------|-------------|---|
| G0:0051099 | positive regulation of binding                         | 174/18866 | 0.00172289  | 0.01007228 | GSK3B/PPARG | 2 |
| G0:0048469 | cell maturation                                        | 179/18866 | 0.001822008 | 0.01060077 | HIF1A/PPARG | 2 |
| G0:0071346 | cellular response to interferon-gamma                  | 182/18866 | 0.001882766 | 0.01085044 | CASP1/PPARG | 2 |
| G0:0090316 | positive regulation of intracellular protein transport | 182/18866 | 0.001882766 | 0.01085044 | GSK3B/PTGS2 | 2 |
| G0:0008217 | regulation of blood pressure                           | 187/18866 | 0.001986167 | 0.01139236 | PPARG/PTGS2 | 2 |
| G0:0010565 | regulation of cellular ketone metabolic process        | 189/18866 | 0.002028276 | 0.01157926 | PPARG/PTGS2 | 2 |
| G0:0010821 | regulation of mitochondrion organization               | 191/18866 | 0.00207081  | 0.01171212 | GSK3B/HIF1A | 2 |
| G0:0048167 | regulation of synaptic plasticity                      | 191/18866 | 0.00207081  | 0.01171212 | GSK3B/PTGS2 | 2 |
| G0:0071248 | cellular response to metal ion                         | 193/18866 | 0.002113771 | 0.01189975 | JUN/PTGS2   | 2 |
| G0:0043112 | receptor metabolic process                             | 198/18866 | 0.002223032 | 0.01245717 | HIF1A/PPARG | 2 |
| G0:0016052 | carbohydrate catabolic process                         | 200/18866 | 0.002267479 | 0.0125902  | HIF1A/STAT3 | 2 |
| G0:0017038 | protein import                                         | 200/18866 | 0.002267479 | 0.0125902  | PTGS2/STAT3 | 2 |
| G0:0031099 | regeneration                                           | 201/18866 | 0.002289862 | 0.01265669 | JUN/PPARG   | 2 |
| G0:0009746 | response to hexose                                     | 202/18866 | 0.00231235  | 0.01266585 | HIF1A/PTGS2 | 2 |
| G0:0034341 | response to interferon-gamma                           | 202/18866 | 0.00231235  | 0.01266585 | CASP1/PPARG | 2 |
| G0:0042594 | response to starvation                                 | 206/18866 | 0.002403362 | 0.01310533 | JUN/PPARG   | 2 |
| G0:0034284 | response to monosaccharide                             | 207/18866 | 0.002426379 | 0.01317177 | HIF1A/PTGS2 | 2 |
| G0:0071456 | cellular response to hypoxia                           | 208/18866 | 0.002449502 | 0.0132382  | HIF1A/PTGS2 | 2 |
| G0:0002573 | myeloid leukocyte differentiation                      | 210/18866 | 0.002496063 | 0.01343015 | JUN/PPARG   | 2 |
| G0:0043523 | regulation of neuron apoptotic process                 | 214/18866 | 0.002590451 | 0.0138766  | HIF1A/JUN   | 2 |
| G0:0036294 | cellular response to decreased oxygen levels           | 218/18866 | 0.00268652  | 0.01432811 | HIF1A/PTGS2 | 2 |
| G0:0002064 | epithelial cell development                            | 221/18866 | 0.002759673 | 0.01452711 | GSK3B/HIF1A | 2 |
| G0:0031669 | cellular response to nutrient levels                   | 221/18866 | 0.002759673 | 0.01452711 | JUN/PPARG   | 2 |

|            |                                                                |           |             |            |             |   |
|------------|----------------------------------------------------------------|-----------|-------------|------------|-------------|---|
| G0:0071241 | cellular response to inorganic substance                       | 221/18866 | 0.002759673 | 0.01452711 | JUN/PTGS2   | 2 |
| G0:0032388 | positive regulation of intracellular transport                 | 222/18866 | 0.002784267 | 0.0145934  | GSK3B/PTGS2 | 2 |
| G0:0032869 | cellular response to insulin stimulus                          | 226/18866 | 0.002883689 | 0.01504964 | GSK3B/PPARG | 2 |
| G0:0048762 | mesenchymal cell differentiation                               | 229/18866 | 0.002959352 | 0.01537851 | GSK3B/HIF1A | 2 |
| G0:0010001 | glial cell differentiation                                     | 230/18866 | 0.002984782 | 0.01544466 | PPARG/STAT3 | 2 |
| G0:0009743 | response to carbohydrate                                       | 233/18866 | 0.003061695 | 0.01577552 | HIF1A/PTGS2 | 2 |
| G0:0097305 | response to alcohol                                            | 234/18866 | 0.003087541 | 0.01584103 | PPARG/STAT3 | 2 |
| G0:0045444 | fat cell differentiation                                       | 235/18866 | 0.003113492 | 0.01584103 | PPARG/PTGS2 | 2 |
| G0:0071695 | anatomical structure maturation                                | 235/18866 | 0.003113492 | 0.01584103 | HIF1A/PPARG | 2 |
| G0:0046777 | protein autophosphorylation                                    | 237/18866 | 0.003165703 | 0.01603956 | GSK3B/JUN   | 2 |
| G0:0051402 | neuron apoptotic process                                       | 245/18866 | 0.003378697 | 0.0170477  | HIF1A/JUN   | 2 |
| G0:0071216 | cellular response to biotic stimulus                           | 246/18866 | 0.003405786 | 0.01711337 | CASP1/GSK3B | 2 |
| G0:0006352 | DNA-templated transcription, initiation                        | 249/18866 | 0.003487675 | 0.01745273 | JUN/PPARG   | 2 |
| G0:0031668 | cellular response to extracellular stimulus                    | 253/18866 | 0.003598303 | 0.01759909 | JUN/PPARG   | 2 |
| G0:0045926 | negative regulation of growth                                  | 254/18866 | 0.003626217 | 0.01759909 | HIF1A/PPARG | 2 |
| G0:0048872 | homeostasis of number of cells                                 | 256/18866 | 0.003682354 | 0.01759909 | HIF1A/STAT3 | 2 |
| G0:0001660 | fever generation                                               | 10/18866  | 0.003705072 | 0.01759909 | PTGS2       | 1 |
| G0:0010887 | negative regulation of cholesterol storage                     | 10/18866  | 0.003705072 | 0.01759909 | PPARG       | 1 |
| G0:0042541 | hemoglobin biosynthetic process                                | 10/18866  | 0.003705072 | 0.01759909 | HIF1A       | 1 |
| G0:0045713 | low-density lipoprotein particle receptor biosynthetic process | 10/18866  | 0.003705072 | 0.01759909 | PPARG       | 1 |
| G0:0051541 | elastin metabolic process                                      | 10/18866  | 0.003705072 | 0.01759909 | HIF1A       | 1 |



|            |                                                           |           |             |            |             |   |
|------------|-----------------------------------------------------------|-----------|-------------|------------|-------------|---|
| G0:0070099 | regulation of chemokine-mediated signaling pathway        | 10/18866  | 0.003705072 | 0.01759909 | HIF1A       | 1 |
| G0:0071104 | response to interleukin-9                                 | 10/18866  | 0.003705072 | 0.01759909 | STAT3       | 1 |
| G0:1904338 | regulation of dopaminergic neuron differentiation         | 10/18866  | 0.003705072 | 0.01759909 | GSK3B       | 1 |
| G0:1904779 | regulation of protein localization to centrosome          | 10/18866  | 0.003705072 | 0.01759909 | GSK3B       | 1 |
| G0:2001054 | negative regulation of mesenchymal cell apoptotic process | 10/18866  | 0.003705072 | 0.01759909 | HIF1A       | 1 |
| G0:0003007 | heart morphogenesis                                       | 258/18866 | 0.003738902 | 0.01762246 | HIF1A/JUN   | 2 |
| G0:0021537 | telencephalon development                                 | 259/18866 | 0.00376733  | 0.01762246 | GSK3B/HIF1A | 2 |
| G0:0042180 | cellular ketone metabolic process                         | 260/18866 | 0.00379586  | 0.01762246 | PPARG/PTGS2 | 2 |
| G0:0033157 | regulation of intracellular protein transport             | 264/18866 | 0.003911005 | 0.01762246 | GSK3B/PTGS2 | 2 |
| G0:0048863 | stem cell differentiation                                 | 264/18866 | 0.003911005 | 0.01762246 | HIF1A/STAT3 | 2 |
| G0:0030522 | intracellular receptor signaling pathway                  | 265/18866 | 0.003940047 | 0.01762246 | PPARG/STAT3 | 2 |
| G0:0009165 | nucleotide biosynthetic process                           | 266/18866 | 0.003969191 | 0.01762246 | PTGS2/STAT3 | 2 |
| G0:0090596 | sensory organ morphogenesis                               | 269/18866 | 0.004057236 | 0.01762246 | HIF1A/STAT3 | 2 |
| G0:1901293 | nucleoside phosphate biosynthetic process                 | 269/18866 | 0.004057236 | 0.01762246 | PTGS2/STAT3 | 2 |
| G0:0019371 | cyclooxygenase pathway                                    | 11/18866  | 0.004074931 | 0.01762246 | PTGS2       | 1 |
| G0:0031652 | positive regulation of heat generation                    | 11/18866  | 0.004074931 | 0.01762246 | PTGS2       | 1 |
| G0:0031915 | positive regulation of synaptic plasticity                | 11/18866  | 0.004074931 | 0.01762246 | PTGS2       | 1 |
| G0:0033197 | response to vitamin E                                     | 11/18866  | 0.004074931 | 0.01762246 | PPARG       | 1 |
| G0:0033210 | leptin-mediated signaling pathway                         | 11/18866  | 0.004074931 | 0.01762246 | STAT3       | 1 |
| G0:0033483 | gas homeostasis                                           | 11/18866  | 0.004074931 | 0.01762246 | HIF1A       | 1 |

|            |                                                                                             |           |             |            |             |   |
|------------|---------------------------------------------------------------------------------------------|-----------|-------------|------------|-------------|---|
| G0:0042789 | mRNA transcription by RNA polymerase II                                                     | 11/18866  | 0.004074931 | 0.01762246 | STAT3       | 1 |
| G0:0043619 | regulation of transcription from RNA polymerase II promoter in response to oxidative stress | 11/18866  | 0.004074931 | 0.01762246 | HIF1A       | 1 |
| G0:0045657 | positive regulation of monocyte differentiation                                             | 11/18866  | 0.004074931 | 0.01762246 | JUN         | 1 |
| G0:0051974 | negative regulation of telomerase activity                                                  | 11/18866  | 0.004074931 | 0.01762246 | PPARG       | 1 |
| G0:0070106 | interleukin-27-mediated signaling pathway                                                   | 11/18866  | 0.004074931 | 0.01762246 | STAT3       | 1 |
| G0:0070757 | interleukin-35-mediated signaling pathway                                                   | 11/18866  | 0.004074931 | 0.01762246 | STAT3       | 1 |
| G0:0090269 | fibroblast growth factor production                                                         | 11/18866  | 0.004074931 | 0.01762246 | PTGS2       | 1 |
| G0:0090270 | regulation of fibroblast growth factor production                                           | 11/18866  | 0.004074931 | 0.01762246 | PTGS2       | 1 |
| G0:0106049 | regulation of cellular response to osmotic stress                                           | 11/18866  | 0.004074931 | 0.01762246 | PTGS2       | 1 |
| G0:1903265 | positive regulation of tumor necrosis factor-mediated signaling pathway                     | 11/18866  | 0.004074931 | 0.01762246 | CASP1       | 1 |
| G0:0051091 | positive regulation of DNA-binding transcription factor activity                            | 270/18866 | 0.004086788 | 0.01762246 | PPARG/STAT3 | 2 |
| G0:0006839 | mitochondrial transport                                                                     | 271/18866 | 0.004116442 | 0.01768761 | GSK3B/STAT3 | 2 |
| G0:0015980 | energy derivation by oxidation of organic compounds                                         | 278/18866 | 0.004326869 | 0.01838341 | GSK3B/HIF1A | 2 |
| G0:0045165 | cell fate commitment                                                                        | 278/18866 | 0.004326869 | 0.01838341 | PPARG/STAT3 | 2 |
| G0:0006983 | ER overload response                                                                        | 12/18866  | 0.004444672 | 0.01838341 | GSK3B       | 1 |
| G0:0031392 | regulation of prostaglandin biosynthetic process                                            | 12/18866  | 0.004444672 | 0.01838341 | PTGS2       | 1 |

|            |                                                                                            |           |             |            |             |   |
|------------|--------------------------------------------------------------------------------------------|-----------|-------------|------------|-------------|---|
| G0:0060019 | radial glial cell differentiation                                                          | 12/18866  | 0.004444672 | 0.01838341 | STAT3       | 1 |
| G0:0070243 | regulation of thymocyte apoptotic process                                                  | 12/18866  | 0.004444672 | 0.01838341 | HIF1A       | 1 |
| G0:0072540 | T-helper 17 cell lineage commitment                                                        | 12/18866  | 0.004444672 | 0.01838341 | STAT3       | 1 |
| G0:0097201 | negative regulation of transcription from RNA polymerase II promoter in response to stress | 12/18866  | 0.004444672 | 0.01838341 | JUN         | 1 |
| G0:1905461 | positive regulation of vascular associated smooth muscle cell apoptotic process            | 12/18866  | 0.004444672 | 0.01838341 | PPARG       | 1 |
| G0:2001053 | regulation of mesenchymal cell apoptotic process                                           | 12/18866  | 0.004444672 | 0.01838341 | HIF1A       | 1 |
| G0:2001223 | negative regulation of neuron migration                                                    | 12/18866  | 0.004444672 | 0.01838341 | STAT3       | 1 |
| G0:0032868 | response to insulin                                                                        | 283/18866 | 0.004480218 | 0.01846761 | GSK3B/PPARG | 2 |
| G0:0021700 | developmental maturation                                                                   | 287/18866 | 0.004604718 | 0.01869106 | HIF1A/PPARG | 2 |
| G0:0060485 | mesenchyme development                                                                     | 290/18866 | 0.004699152 | 0.01869106 | GSK3B/HIF1A | 2 |
| G0:0097193 | intrinsic apoptotic signaling pathway                                                      | 290/18866 | 0.004699152 | 0.01869106 | HIF1A/PTGS2 | 2 |
| G0:0002674 | negative regulation of acute inflammatory response                                         | 13/18866  | 0.004814296 | 0.01869106 | PPARG       | 1 |
| G0:0010745 | negative regulation of macrophage derived foam cell differentiation                        | 13/18866  | 0.004814296 | 0.01869106 | PPARG       | 1 |
| G0:0010870 | positive regulation of receptor biosynthetic process                                       | 13/18866  | 0.004814296 | 0.01869106 | HIF1A       | 1 |
| G0:0014842 | regulation of skeletal muscle satellite cell proliferation                                 | 13/18866  | 0.004814296 | 0.01869106 | STAT3       | 1 |
| G0:0031053 | primary miRNA processing                                                                   | 13/18866  | 0.004814296 | 0.01869106 | STAT3       | 1 |
| G0:0031650 | regulation of heat generation                                                              | 13/18866  | 0.004814296 | 0.01869106 | PTGS2       | 1 |

|            |                                                    |           |             |            |             |   |
|------------|----------------------------------------------------|-----------|-------------|------------|-------------|---|
| G0:0031953 | negative regulation of protein autophosphorylation | 13/18866  | 0.004814296 | 0.01869106 | JUN         | 1 |
| G0:0032352 | positive regulation of hormone metabolic process   | 13/18866  | 0.004814296 | 0.01869106 | HIF1A       | 1 |
| G0:0035723 | interleukin-15-mediated signaling pathway          | 13/18866  | 0.004814296 | 0.01869106 | STAT3       | 1 |
| G0:0060100 | positive regulation of phagocytosis, engulfment    | 13/18866  | 0.004814296 | 0.01869106 | PPARG       | 1 |
| G0:0061029 | eyelid development in camera-type eye              | 13/18866  | 0.004814296 | 0.01869106 | JUN         | 1 |
| G0:0071350 | cellular response to interleukin-15                | 13/18866  | 0.004814296 | 0.01869106 | STAT3       | 1 |
| G0:0097152 | mesenchymal cell apoptotic process                 | 13/18866  | 0.004814296 | 0.01869106 | HIF1A       | 1 |
| G0:1905155 | positive regulation of membrane invagination       | 13/18866  | 0.004814296 | 0.01869106 | PPARG       | 1 |
| G0:0034976 | response to endoplasmic reticulum stress           | 294/18866 | 0.004826475 | 0.01869106 | GSK3B/JUN   | 2 |
| G0:0044262 | cellular carbohydrate metabolic process            | 294/18866 | 0.004826475 | 0.01869106 | GSK3B/STAT3 | 2 |
| G0:0050768 | negative regulation of neurogenesis                | 295/18866 | 0.004858557 | 0.01875557 | GSK3B/STAT3 | 2 |
| G0:0051348 | negative regulation of transferase activity        | 296/18866 | 0.00489074  | 0.01882006 | GSK3B/PPARG | 2 |
| G0:0010889 | regulation of sequestering of triglyceride         | 14/18866  | 0.005183802 | 0.01910153 | PPARG       | 1 |
| G0:0014841 | skeletal muscle satellite cell proliferation       | 14/18866  | 0.005183802 | 0.01910153 | STAT3       | 1 |
| G0:0014857 | regulation of skeletal muscle cell proliferation   | 14/18866  | 0.005183802 | 0.01910153 | STAT3       | 1 |
| G0:0019896 | axonal transport of mitochondrion                  | 14/18866  | 0.005183802 | 0.01910153 | HIF1A       | 1 |

|            |                                                                                 |           |             |            |             |   |
|------------|---------------------------------------------------------------------------------|-----------|-------------|------------|-------------|---|
| G0:0034356 | NAD biosynthesis via nicotinamide riboside salvage pathway                      | 14/18866  | 0.005183802 | 0.01910153 | PTGS2       | 1 |
| G0:0036295 | cellular response to increased oxygen levels                                    | 14/18866  | 0.005183802 | 0.01910153 | PPARG       | 1 |
| G0:0043922 | negative regulation by host of viral transcription                              | 14/18866  | 0.005183802 | 0.01910153 | JUN         | 1 |
| G0:0046321 | positive regulation of fatty acid oxidation                                     | 14/18866  | 0.005183802 | 0.01910153 | PPARG       | 1 |
| G0:0047484 | regulation of response to osmotic stress                                        | 14/18866  | 0.005183802 | 0.01910153 | PTGS2       | 1 |
| G0:0050872 | white fat cell differentiation                                                  | 14/18866  | 0.005183802 | 0.01910153 | PPARG       | 1 |
| G0:0060397 | growth hormone receptor signaling pathway via JAK-STAT                          | 14/18866  | 0.005183802 | 0.01910153 | STAT3       | 1 |
| G0:0070672 | response to interleukin-15                                                      | 14/18866  | 0.005183802 | 0.01910153 | STAT3       | 1 |
| G0:1903799 | negative regulation of production of miRNAs involved in gene silencing by miRNA | 14/18866  | 0.005183802 | 0.01910153 | STAT3       | 1 |
| G0:2001279 | regulation of unsaturated fatty acid biosynthetic process                       | 14/18866  | 0.005183802 | 0.01910153 | PTGS2       | 1 |
| G0:0042063 | gliogenesis                                                                     | 307/18866 | 0.005251363 | 0.01929202 | PPARG/STAT3 | 2 |
| G0:0018105 | peptidyl-serine phosphorylation                                                 | 310/18866 | 0.005351813 | 0.01954296 | GSK3B/PTGS2 | 2 |
| G0:0034599 | cellular response to oxidative stress                                           | 310/18866 | 0.005351813 | 0.01954296 | HIF1A/JUN   | 2 |
| G0:0046034 | ATP metabolic process                                                           | 311/18866 | 0.005385496 | 0.01960707 | HIF1A/STAT3 | 2 |
| G0:0006089 | lactate metabolic process                                                       | 15/18866  | 0.005553191 | 0.01968712 | HIF1A       | 1 |
| G0:0014856 | skeletal muscle cell proliferation                                              | 15/18866  | 0.005553191 | 0.01968712 | STAT3       | 1 |
| G0:0020027 | hemoglobin metabolic process                                                    | 15/18866  | 0.005553191 | 0.01968712 | HIF1A       | 1 |
| G0:0045820 | negative regulation of glycolytic process                                       | 15/18866  | 0.005553191 | 0.01968712 | STAT3       | 1 |

|            |                                                              |           |             |            |             |   |
|------------|--------------------------------------------------------------|-----------|-------------|------------|-------------|---|
| G0:0060099 | regulation of phagocytosis, engulfment                       | 15/18866  | 0.005553191 | 0.01968712 | PPARG       | 1 |
| G0:0070885 | negative regulation of calcineurin-NFAT signaling cascade    | 15/18866  | 0.005553191 | 0.01968712 | GSK3B       | 1 |
| G0:0090594 | inflammatory response to wounding                            | 15/18866  | 0.005553191 | 0.01968712 | HIF1A       | 1 |
| G0:0106057 | negative regulation of calcineurin-mediated signaling        | 15/18866  | 0.005553191 | 0.01968712 | GSK3B       | 1 |
| G0:2001171 | positive regulation of ATP biosynthetic process              | 15/18866  | 0.005553191 | 0.01968712 | STAT3       | 1 |
| G0:0009416 | response to light stimulus                                   | 319/18866 | 0.005658536 | 0.01994429 | HIF1A/PTGS2 | 2 |
| G0:0051961 | negative regulation of nervous system development            | 319/18866 | 0.005658536 | 0.01994429 | GSK3B/STAT3 | 2 |
| G0:0034612 | response to tumor necrosis factor                            | 320/18866 | 0.005693112 | 0.02000816 | CASP1/PTGS2 | 2 |
| G0:0002070 | epithelial cell maturation                                   | 16/18866  | 0.005922462 | 0.02028652 | HIF1A       | 1 |
| G0:0002295 | T-helper cell lineage commitment                             | 16/18866  | 0.005922462 | 0.02028652 | STAT3       | 1 |
| G0:0019372 | lipxygenase pathway                                          | 16/18866  | 0.005922462 | 0.02028652 | PTGS2       | 1 |
| G0:0032225 | regulation of synaptic transmission, dopaminergic            | 16/18866  | 0.005922462 | 0.02028652 | PTGS2       | 1 |
| G0:0060576 | intestinal epithelial cell development                       | 16/18866  | 0.005922462 | 0.02028652 | HIF1A       | 1 |
| G0:0060850 | regulation of transcription involved in cell fate commitment | 16/18866  | 0.005922462 | 0.02028652 | PPARG       | 1 |
| G0:0071380 | cellular response to prostaglandin E stimulus                | 16/18866  | 0.005922462 | 0.02028652 | PPARG       | 1 |
| G0:1905050 | positive regulation of metallopeptidase activity             | 16/18866  | 0.005922462 | 0.02028652 | STAT3       | 1 |
| G0:1905153 | regulation of membrane invagination                          | 16/18866  | 0.005922462 | 0.02028652 | PPARG       | 1 |

|            |                                                                                      |           |             |                        |   |
|------------|--------------------------------------------------------------------------------------|-----------|-------------|------------------------|---|
| G0:0071214 | cellular response to abiotic stimulus                                                | 331/18866 | 0.006079979 | 0.020511 CASP1/PTGS2   | 2 |
| G0:0104004 | cellular response to environmental stimulus                                          | 331/18866 | 0.006079979 | 0.020511 CASP1/PTGS2   | 2 |
| G0:0043010 | camera-type eye development                                                          | 332/18866 | 0.00611574  | 0.020511 HIF1A/JUN     | 2 |
| G0:0018209 | peptidyl-serine modification                                                         | 333/18866 | 0.0061516   | 0.020511 GSK3B/PTGS2   | 2 |
| G0:0032496 | response to lipopolysaccharide                                                       | 334/18866 | 0.006187558 | 0.020511 CASP1/PTGS2   | 2 |
| G0:0009299 | mRNA transcription                                                                   | 17/18866  | 0.006291616 | 0.020511 STAT3         | 1 |
| G0:0030730 | sequestering of triglyceride                                                         | 17/18866  | 0.006291616 | 0.020511 PPARG         | 1 |
| G0:0030949 | positive regulation of vascular endothelial growth factor receptor signaling pathway | 17/18866  | 0.006291616 | 0.020511 HIF1A         | 1 |
| G0:0031000 | response to caffeine                                                                 | 17/18866  | 0.006291616 | 0.020511 PPARG         | 1 |
| G0:0031649 | heat generation                                                                      | 17/18866  | 0.006291616 | 0.020511 PTGS2         | 1 |
| G0:0032966 | negative regulation of collagen biosynthetic process                                 | 17/18866  | 0.006291616 | 0.020511 PPARG         | 1 |
| G0:0042953 | lipoprotein transport                                                                | 17/18866  | 0.006291616 | 0.020511 PPARG         | 1 |
| G0:0043923 | positive regulation by host of viral transcription                                   | 17/18866  | 0.006291616 | 0.020511 JUN           | 1 |
| G0:0045986 | negative regulation of smooth muscle contraction                                     | 17/18866  | 0.006291616 | 0.020511 PTGS2         | 1 |
| G0:0050665 | hydrogen peroxide biosynthetic process                                               | 17/18866  | 0.006291616 | 0.020511 STAT3         | 1 |
| G0:0060644 | mammary gland epithelial cell differentiation                                        | 17/18866  | 0.006291616 | 0.020511 HIF1A         | 1 |
| G0:0070242 | thymocyte apoptotic process                                                          | 17/18866  | 0.006291616 | 0.020511 HIF1A         | 1 |
| G0:0090336 | positive regulation of brown fat cell differentiation                                | 17/18866  | 0.006291616 | 0.020511 PTGS2         | 1 |
| G0:1903829 | positive regulation of cellular protein localization                                 | 338/18866 | 0.006332372 | 0.02058867 GSK3B/PTGS2 | 2 |
| G0:0010721 | negative regulation of cell development                                              | 343/18866 | 0.006515594 | 0.0211279 GSK3B/STAT3  | 2 |

|            |                                                             |           |             |            |             |   |
|------------|-------------------------------------------------------------|-----------|-------------|------------|-------------|---|
| G0:0010713 | negative regulation of collagen metabolic process           | 18/18866  | 0.006660651 | 0.02120249 | PPARG       | 1 |
| G0:0010885 | regulation of cholesterol storage                           | 18/18866  | 0.006660651 | 0.02120249 | PPARG       | 1 |
| G0:0035994 | response to muscle stretch                                  | 18/18866  | 0.006660651 | 0.02120249 | JUN         | 1 |
| G0:0044872 | lipoprotein localization                                    | 18/18866  | 0.006660651 | 0.02120249 | PPARG       | 1 |
| G0:0046885 | regulation of hormone biosynthetic process                  | 18/18866  | 0.006660651 | 0.02120249 | HIF1A       | 1 |
| G0:0061298 | retina vasculature development in camera-type eye           | 18/18866  | 0.006660651 | 0.02120249 | HIF1A       | 1 |
| G0:0071318 | cellular response to ATP                                    | 18/18866  | 0.006660651 | 0.02120249 | PTGS2       | 1 |
| G0:0030336 | negative regulation of cell migration                       | 350/18866 | 0.006776209 | 0.02151402 | PPARG/STAT3 | 2 |
| G0:0048638 | regulation of developmental growth                          | 353/18866 | 0.006889363 | 0.02153138 | GSK3B/STAT3 | 2 |
| G0:0002237 | response to molecule of bacterial origin                    | 356/18866 | 0.007003391 | 0.02153138 | CASP1/PTGS2 | 2 |
| G0:0030011 | maintenance of cell polarity                                | 19/18866  | 0.00702957  | 0.02153138 | GSK3B       | 1 |
| G0:0033189 | response to vitamin A                                       | 19/18866  | 0.00702957  | 0.02153138 | PPARG       | 1 |
| G0:0034393 | positive regulation of smooth muscle cell apoptotic process | 19/18866  | 0.00702957  | 0.02153138 | PPARG       | 1 |
| G0:0043373 | CD4-positive, alpha-beta T cell lineage commitment          | 19/18866  | 0.00702957  | 0.02153138 | STAT3       | 1 |
| G0:0044320 | cellular response to leptin stimulus                        | 19/18866  | 0.00702957  | 0.02153138 | STAT3       | 1 |
| G0:0060749 | mammary gland alveolus development                          | 19/18866  | 0.00702957  | 0.02153138 | HIF1A       | 1 |
| G0:0061377 | mammary gland lobule development                            | 19/18866  | 0.00702957  | 0.02153138 | HIF1A       | 1 |
| G0:0070233 | negative regulation of T cell apoptotic process             | 19/18866  | 0.00702957  | 0.02153138 | HIF1A       | 1 |



|            |                                                                                       |           |             |            |             |   |
|------------|---------------------------------------------------------------------------------------|-----------|-------------|------------|-------------|---|
| G0:1902176 | negative regulation of oxidative stress-induced intrinsic apoptotic signaling pathway | 19/18866  | 0.00702957  | 0.02153138 | HIF1A       | 1 |
| G0:1904683 | regulation of metalloendopeptidase activity                                           | 19/18866  | 0.00702957  | 0.02153138 | STAT3       | 1 |
| G0:1905288 | vascular associated smooth muscle cell apoptotic process                              | 19/18866  | 0.00702957  | 0.02153138 | PPARG       | 1 |
| G0:1905459 | regulation of vascular associated smooth muscle cell apoptotic process                | 19/18866  | 0.00702957  | 0.02153138 | PPARG       | 1 |
| G0:0032386 | regulation of intracellular transport                                                 | 358/18866 | 0.007079896 | 0.02163104 | GSK3B/PTGS2 | 2 |
| G0:0001666 | response to hypoxia                                                                   | 359/18866 | 0.007118293 | 0.02169385 | HIF1A/PTGS2 | 2 |
| G0:2000146 | negative regulation of cell motility                                                  | 365/18866 | 0.00735071  | 0.02215867 | PPARG/STAT3 | 2 |
| G0:0003323 | type B pancreatic cell development                                                    | 20/18866  | 0.007398371 | 0.02215867 | GSK3B       | 1 |
| G0:0010042 | response to manganese ion                                                             | 20/18866  | 0.007398371 | 0.02215867 | PTGS2       | 1 |
| G0:0010878 | cholesterol storage                                                                   | 20/18866  | 0.007398371 | 0.02215867 | PPARG       | 1 |
| G0:0071636 | positive regulation of transforming growth factor beta production                     | 20/18866  | 0.007398371 | 0.02215867 | PTGS2       | 1 |
| G0:0097709 | connective tissue replacement                                                         | 20/18866  | 0.007398371 | 0.02215867 | HIF1A       | 1 |
| G0:2001169 | regulation of ATP biosynthetic process                                                | 20/18866  | 0.007398371 | 0.02215867 | STAT3       | 1 |
| G0:0036293 | response to decreased oxygen levels                                                   | 371/18866 | 0.007586601 | 0.02243406 | HIF1A/PTGS2 | 2 |
| G0:0002363 | alpha-beta T cell lineage commitment                                                  | 21/18866  | 0.007767055 | 0.02243406 | STAT3       | 1 |
| G0:0010310 | regulation of hydrogen peroxide metabolic process                                     | 21/18866  | 0.007767055 | 0.02243406 | STAT3       | 1 |
| G0:0016540 | protein autoprocesing                                                                 | 21/18866  | 0.007767055 | 0.02243406 | CASP1       | 1 |

|            |                                                                    |          |             |            |       |   |
|------------|--------------------------------------------------------------------|----------|-------------|------------|-------|---|
| G0:0030502 | negative regulation of bone mineralization                         | 21/18866 | 0.007767055 | 0.02243406 | HIF1A | 1 |
| G0:0030728 | ovulation                                                          | 21/18866 | 0.007767055 | 0.02243406 | PTGS2 | 1 |
| G0:0035357 | peroxisome proliferator activated receptor signaling pathway       | 21/18866 | 0.007767055 | 0.02243406 | PPARG | 1 |
| G0:0046716 | muscle cell cellular homeostasis                                   | 21/18866 | 0.007767055 | 0.02243406 | HIF1A | 1 |
| G0:0046827 | positive regulation of protein export from nucleus                 | 21/18866 | 0.007767055 | 0.02243406 | GSK3B | 1 |
| G0:0071498 | cellular response to fluid shear stress                            | 21/18866 | 0.007767055 | 0.02243406 | PTGS2 | 1 |
| G0:1900543 | negative regulation of purine nucleotide metabolic process         | 21/18866 | 0.007767055 | 0.02243406 | STAT3 | 1 |
| G0:1903204 | negative regulation of oxidative stress-induced neuron death       | 21/18866 | 0.007767055 | 0.02243406 | HIF1A | 1 |
| G0:1903599 | positive regulation of autophagy of mitochondrion                  | 21/18866 | 0.007767055 | 0.02243406 | HIF1A | 1 |
| G0:1904886 | beta-catenin destruction complex disassembly                       | 21/18866 | 0.007767055 | 0.02243406 | GSK3B | 1 |
| G0:2000737 | negative regulation of stem cell differentiation                   | 21/18866 | 0.007767055 | 0.02243406 | STAT3 | 1 |
| G0:0010888 | negative regulation of lipid storage                               | 22/18866 | 0.008135621 | 0.02310247 | PPARG | 1 |
| G0:0043369 | CD4-positive or CD8-positive, alpha-beta T cell lineage commitment | 22/18866 | 0.008135621 | 0.02310247 | STAT3 | 1 |
| G0:0045655 | regulation of monocyte differentiation                             | 22/18866 | 0.008135621 | 0.02310247 | JUN   | 1 |
| G0:0045980 | negative regulation of nucleotide metabolic process                | 22/18866 | 0.008135621 | 0.02310247 | STAT3 | 1 |

|            |                                                                   |           |             |            |             |   |
|------------|-------------------------------------------------------------------|-----------|-------------|------------|-------------|---|
| G0:0051000 | positive regulation of nitric-oxide synthase activity             | 22/18866  | 0.008135621 | 0.02310247 | HIF1A       | 1 |
| G0:0055093 | response to hyperoxia                                             | 22/18866  | 0.008135621 | 0.02310247 | PPARG       | 1 |
| G0:0071379 | cellular response to prostaglandin stimulus                       | 22/18866  | 0.008135621 | 0.02310247 | PPARG       | 1 |
| G0:0031349 | positive regulation of defense response                           | 385/18866 | 0.00815046  | 0.02310247 | PTGS2/STAT3 | 2 |
| G0:0031331 | positive regulation of cellular catabolic process                 | 390/18866 | 0.008356377 | 0.02323809 | GSK3B/HIF1A | 2 |
| G0:0030900 | forebrain development                                             | 391/18866 | 0.008397847 | 0.02323809 | GSK3B/HIF1A | 2 |
| G0:0002052 | positive regulation of neuroblast proliferation                   | 23/18866  | 0.00850407  | 0.02323809 | HIF1A       | 1 |
| G0:0010226 | response to lithium ion                                           | 23/18866  | 0.00850407  | 0.02323809 | PTGS2       | 1 |
| G0:0010288 | response to lead ion                                              | 23/18866  | 0.00850407  | 0.02323809 | PTGS2       | 1 |
| G0:0032799 | low-density lipoprotein receptor particle metabolic process       | 23/18866  | 0.00850407  | 0.02323809 | PPARG       | 1 |
| G0:0034643 | establishment of mitochondrion localization, microtubule-mediated | 23/18866  | 0.00850407  | 0.02323809 | HIF1A       | 1 |
| G0:0035162 | embryonic hemopoiesis                                             | 23/18866  | 0.00850407  | 0.02323809 | HIF1A       | 1 |
| G0:0045723 | positive regulation of fatty acid biosynthetic process            | 23/18866  | 0.00850407  | 0.02323809 | PTGS2       | 1 |
| G0:0047497 | mitochondrion transport along microtubule                         | 23/18866  | 0.00850407  | 0.02323809 | HIF1A       | 1 |
| G0:0048714 | positive regulation of oligodendrocyte differentiation            | 23/18866  | 0.00850407  | 0.02323809 | PPARG       | 1 |
| G0:0071404 | cellular response to low-density lipoprotein particle stimulus    | 23/18866  | 0.00850407  | 0.02323809 | PPARG       | 1 |

|            |                                                                                                                         |           |             |            |             |   |
|------------|-------------------------------------------------------------------------------------------------------------------------|-----------|-------------|------------|-------------|---|
| GO:1900017 | positive regulation of cytokine production involved in inflammatory response                                            | 23/18866  | 0.00850407  | 0.02323809 | STAT3       | 1 |
| GO:1901522 | positive regulation of transcription from RNA polymerase II promoter involved in cellular response to chemical stimulus | 23/18866  | 0.00850407  | 0.02323809 | HIF1A       | 1 |
| GO:1901984 | negative regulation of protein acetylation                                                                              | 23/18866  | 0.00850407  | 0.02323809 | GSK3B       | 1 |
| GO:1903798 | regulation of production of miRNAs involved in gene silencing by miRNA                                                  | 23/18866  | 0.00850407  | 0.02323809 | STAT3       | 1 |
| GO:0006631 | fatty acid metabolic process                                                                                            | 396/18866 | 0.008606618 | 0.02346558 | PPARG/PTGS2 | 2 |
| GO:0040013 | negative regulation of locomotion                                                                                       | 397/18866 | 0.008648657 | 0.02352744 | PPARG/STAT3 | 2 |
| GO:0051271 | negative regulation of cellular component movement                                                                      | 400/18866 | 0.008775341 | 0.02360797 | PPARG/STAT3 | 2 |
| GO:0009150 | purine ribonucleotide metabolic process                                                                                 | 401/18866 | 0.008817759 | 0.02360797 | HIF1A/STAT3 | 2 |
| GO:0014850 | response to muscle activity                                                                                             | 24/18866  | 0.008872401 | 0.02360797 | HIF1A       | 1 |
| GO:0034695 | response to prostaglandin E                                                                                             | 24/18866  | 0.008872401 | 0.02360797 | PPARG       | 1 |
| GO:0036003 | positive regulation of transcription from RNA polymerase II promoter in response to stress                              | 24/18866  | 0.008872401 | 0.02360797 | HIF1A       | 1 |
| GO:0044321 | response to leptin                                                                                                      | 24/18866  | 0.008872401 | 0.02360797 | STAT3       | 1 |
| GO:0045821 | positive regulation of glycolytic process                                                                               | 24/18866  | 0.008872401 | 0.02360797 | HIF1A       | 1 |
| GO:0060396 | growth hormone receptor signaling pathway                                                                               | 24/18866  | 0.008872401 | 0.02360797 | STAT3       | 1 |
| GO:0090335 | regulation of brown fat cell differentiation                                                                            | 24/18866  | 0.008872401 | 0.02360797 | PTGS2       | 1 |

|            |                                                                         |           |             |            |             |   |
|------------|-------------------------------------------------------------------------|-----------|-------------|------------|-------------|---|
| G0:2000637 | positive regulation of gene silencing by miRNA                          | 24/18866  | 0.008872401 | 0.02360797 | STAT3       | 1 |
| G0:0043547 | positive regulation of GTPase activity                                  | 406/18866 | 0.009031263 | 0.02395861 | GSK3B/JUN   | 2 |
| G0:0003309 | type B pancreatic cell differentiation                                  | 25/18866  | 0.009240616 | 0.02395861 | GSK3B       | 1 |
| G0:0046697 | decidualization                                                         | 25/18866  | 0.009240616 | 0.02395861 | PTGS2       | 1 |
| G0:0060148 | positive regulation of posttranscriptional gene silencing               | 25/18866  | 0.009240616 | 0.02395861 | STAT3       | 1 |
| G0:0060259 | regulation of feeding behavior                                          | 25/18866  | 0.009240616 | 0.02395861 | STAT3       | 1 |
| G0:0060330 | regulation of response to interferon-gamma                              | 25/18866  | 0.009240616 | 0.02395861 | PPARG       | 1 |
| G0:0060334 | regulation of interferon-gamma-mediated signaling pathway               | 25/18866  | 0.009240616 | 0.02395861 | PPARG       | 1 |
| G0:0060571 | morphogenesis of an epithelial fold                                     | 25/18866  | 0.009240616 | 0.02395861 | HIF1A       | 1 |
| G0:0060575 | intestinal epithelial cell differentiation                              | 25/18866  | 0.009240616 | 0.02395861 | HIF1A       | 1 |
| G0:0070920 | regulation of production of small RNA involved in gene silencing by RNA | 25/18866  | 0.009240616 | 0.02395861 | STAT3       | 1 |
| G0:0071378 | cellular response to growth hormone stimulus                            | 25/18866  | 0.009240616 | 0.02395861 | STAT3       | 1 |
| G0:1905564 | positive regulation of vascular endothelial cell proliferation          | 25/18866  | 0.009240616 | 0.02395861 | STAT3       | 1 |
| G0:0001503 | ossification                                                            | 412/18866 | 0.009290579 | 0.0240369  | HIF1A/PTGS2 | 2 |
| G0:0009259 | ribonucleotide metabolic process                                        | 416/18866 | 0.009465335 | 0.02443704 | HIF1A/STAT3 | 2 |
| G0:0002068 | glandular epithelial cell development                                   | 26/18866  | 0.009608713 | 0.02454663 | GSK3B       | 1 |

|            |                                                                              |           |             |            |             |   |
|------------|------------------------------------------------------------------------------|-----------|-------------|------------|-------------|---|
| G0:0030810 | positive regulation of nucleotide biosynthetic process                       | 26/18866  | 0.009608713 | 0.02454663 | STAT3       | 1 |
| G0:0035902 | response to immobilization stress                                            | 26/18866  | 0.009608713 | 0.02454663 | PPARG       | 1 |
| G0:0051654 | establishment of mitochondrion localization                                  | 26/18866  | 0.009608713 | 0.02454663 | HIF1A       | 1 |
| G0:1900373 | positive regulation of purine nucleotide biosynthetic process                | 26/18866  | 0.009608713 | 0.02454663 | STAT3       | 1 |
| G0:0001558 | regulation of cell growth                                                    | 420/18866 | 0.00964159  | 0.02457898 | GSK3B/PPARG | 2 |
| G0:0019693 | ribose phosphate metabolic process                                           | 427/18866 | 0.009953634 | 0.0251173  | HIF1A/STAT3 | 2 |
| G0:0001963 | synaptic transmission, dopaminergic                                          | 27/18866  | 0.009976692 | 0.0251173  | PTGS2       | 1 |
| G0:0032897 | negative regulation of viral transcription                                   | 27/18866  | 0.009976692 | 0.0251173  | JUN         | 1 |
| G0:0072539 | T-helper 17 cell differentiation                                             | 27/18866  | 0.009976692 | 0.0251173  | STAT3       | 1 |
| G0:1902175 | regulation of oxidative stress-induced intrinsic apoptotic signaling pathway | 27/18866  | 0.009976692 | 0.0251173  | HIF1A       | 1 |
| G0:1903203 | regulation of oxidative stress-induced neuron death                          | 27/18866  | 0.009976692 | 0.0251173  | HIF1A       | 1 |
| G0:0019216 | regulation of lipid metabolic process                                        | 431/18866 | 0.010133994 | 0.02546061 | PPARG/PTGS2 | 2 |
| G0:0002360 | T cell lineage commitment                                                    | 28/18866  | 0.010344555 | 0.02567139 | STAT3       | 1 |
| G0:0035883 | enteroendocrine cell differentiation                                         | 28/18866  | 0.010344555 | 0.02567139 | GSK3B       | 1 |
| G0:0045932 | negative regulation of muscle contraction                                    | 28/18866  | 0.010344555 | 0.02567139 | PTGS2       | 1 |
| G0:1903579 | negative regulation of ATP metabolic process                                 | 28/18866  | 0.010344555 | 0.02567139 | STAT3       | 1 |

|            |                                                                |           |             |            |             |   |
|------------|----------------------------------------------------------------|-----------|-------------|------------|-------------|---|
| GO:1905563 | negative regulation of vascular endothelial cell proliferation | 28/18866  | 0.010344555 | 0.02567139 | PPARG       | 1 |
| GO:1990776 | response to angiotensin                                        | 28/18866  | 0.010344555 | 0.02567139 | PTGS2       | 1 |
| GO:0006163 | purine nucleotide metabolic process                            | 442/18866 | 0.010637638 | 0.02626241 | HIF1A/STAT3 | 2 |
| GO:0042391 | regulation of membrane potential                               | 443/18866 | 0.010683979 | 0.02626241 | GSK3B/JUN   | 2 |
| GO:0048732 | gland development                                              | 443/18866 | 0.010683979 | 0.02626241 | HIF1A/JUN   | 2 |
| GO:0001782 | B cell homeostasis                                             | 29/18866  | 0.0107123   | 0.02626241 | HIF1A       | 1 |
| GO:0009435 | NAD biosynthetic process                                       | 29/18866  | 0.0107123   | 0.02626241 | PTGS2       | 1 |
| GO:0036296 | response to increased oxygen levels                            | 29/18866  | 0.0107123   | 0.02626241 | PPARG       | 1 |
| GO:0009314 | response to radiation                                          | 447/18866 | 0.010870264 | 0.02657435 | HIF1A/PTGS2 | 2 |
| GO:0001516 | prostaglandin biosynthetic process                             | 30/18866  | 0.011079929 | 0.02657435 | PTGS2       | 1 |
| GO:0005979 | regulation of glycogen biosynthetic process                    | 30/18866  | 0.011079929 | 0.02657435 | GSK3B       | 1 |
| GO:0010962 | regulation of glucan biosynthetic process                      | 30/18866  | 0.011079929 | 0.02657435 | GSK3B       | 1 |
| GO:0036475 | neuron death in response to oxidative stress                   | 30/18866  | 0.011079929 | 0.02657435 | HIF1A       | 1 |
| GO:0038111 | interleukin-7-mediated signaling pathway                       | 30/18866  | 0.011079929 | 0.02657435 | STAT3       | 1 |
| GO:0043457 | regulation of cellular respiration                             | 30/18866  | 0.011079929 | 0.02657435 | HIF1A       | 1 |
| GO:0046457 | prostanoid biosynthetic process                                | 30/18866  | 0.011079929 | 0.02657435 | PTGS2       | 1 |
| GO:0048147 | negative regulation of fibroblast proliferation                | 30/18866  | 0.011079929 | 0.02657435 | PPARG       | 1 |
| GO:0070168 | negative regulation of biomineral tissue development           | 30/18866  | 0.011079929 | 0.02657435 | HIF1A       | 1 |

|            |                                                            |           |             |            |             |   |
|------------|------------------------------------------------------------|-----------|-------------|------------|-------------|---|
| G0:0110150 | negative regulation of biomineralization                   | 30/18866  | 0.011079929 | 0.02657435 | HIF1A       | 1 |
| G0:0009896 | positive regulation of catabolic process                   | 454/18866 | 0.011199802 | 0.02680898 | GSK3B/HIF1A | 2 |
| G0:0002675 | positive regulation of acute inflammatory response         | 31/18866  | 0.01144744  | 0.0270293  | PTGS2       | 1 |
| G0:0032770 | positive regulation of monooxygenase activity              | 31/18866  | 0.01144744  | 0.0270293  | HIF1A       | 1 |
| G0:0045987 | positive regulation of smooth muscle contraction           | 31/18866  | 0.01144744  | 0.0270293  | PTGS2       | 1 |
| G0:0070229 | negative regulation of lymphocyte apoptotic process        | 31/18866  | 0.01144744  | 0.0270293  | HIF1A       | 1 |
| G0:0071539 | protein localization to centrosome                         | 31/18866  | 0.01144744  | 0.0270293  | GSK3B       | 1 |
| G0:0072538 | T-helper 17 type immune response                           | 31/18866  | 0.01144744  | 0.0270293  | STAT3       | 1 |
| G0:1900181 | negative regulation of protein localization to nucleus     | 31/18866  | 0.01144744  | 0.0270293  | GSK3B       | 1 |
| G0:0010743 | regulation of macrophage derived foam cell differentiation | 32/18866  | 0.011814834 | 0.02741763 | PPARG       | 1 |
| G0:0019359 | nicotinamide nucleotide biosynthetic process               | 32/18866  | 0.011814834 | 0.02741763 | PTGS2       | 1 |
| G0:0019363 | pyridine nucleotide biosynthetic process                   | 32/18866  | 0.011814834 | 0.02741763 | PTGS2       | 1 |
| G0:0032350 | regulation of hormone metabolic process                    | 32/18866  | 0.011814834 | 0.02741763 | HIF1A       | 1 |
| G0:0034694 | response to prostaglandin                                  | 32/18866  | 0.011814834 | 0.02741763 | PPARG       | 1 |
| G0:0046320 | regulation of fatty acid oxidation                         | 32/18866  | 0.011814834 | 0.02741763 | PPARG       | 1 |
| G0:0050849 | negative regulation of calcium-mediated signaling          | 32/18866  | 0.011814834 | 0.02741763 | GSK3B       | 1 |



|            |                                                                                            |           |             |            |             |   |
|------------|--------------------------------------------------------------------------------------------|-----------|-------------|------------|-------------|---|
| G0:0051968 | positive regulation of synaptic transmission, glutamatergic                                | 32/18866  | 0.011814834 | 0.02741763 | PTGS2       | 1 |
| G0:0071295 | cellular response to vitamin                                                               | 32/18866  | 0.011814834 | 0.02741763 | PPARG       | 1 |
| G0:0060249 | anatomical structure homeostasis                                                           | 469/18866 | 0.011921054 | 0.02761143 | HIF1A/PTGS2 | 2 |
| G0:0072521 | purine-containing compound metabolic process                                               | 472/18866 | 0.012067762 | 0.02784483 | HIF1A/STAT3 | 2 |
| G0:0051346 | negative regulation of hydrolase activity                                                  | 473/18866 | 0.012116847 | 0.02784483 | GSK3B/PTGS2 | 2 |
| G0:0010039 | response to iron ion                                                                       | 33/18866  | 0.012182111 | 0.02784483 | HIF1A       | 1 |
| G0:0042755 | eating behavior                                                                            | 33/18866  | 0.012182111 | 0.02784483 | STAT3       | 1 |
| G0:0048384 | retinoic acid receptor signaling pathway                                                   | 33/18866  | 0.012182111 | 0.02784483 | PPARG       | 1 |
| G0:1905048 | regulation of metallopeptidase activity                                                    | 33/18866  | 0.012182111 | 0.02784483 | STAT3       | 1 |
| G0:1905508 | protein localization to microtubule organizing center                                      | 33/18866  | 0.012182111 | 0.02784483 | GSK3B       | 1 |
| G0:0043087 | regulation of GTPase activity                                                              | 481/18866 | 0.012512779 | 0.02815482 | GSK3B/JUN   | 2 |
| G0:0033198 | response to ATP                                                                            | 34/18866  | 0.012549271 | 0.02815482 | PTGS2       | 1 |
| G0:0035633 | maintenance of blood-brain barrier                                                         | 34/18866  | 0.012549271 | 0.02815482 | PTGS2       | 1 |
| G0:0035774 | positive regulation of insulin secretion involved in cellular response to glucose stimulus | 34/18866  | 0.012549271 | 0.02815482 | HIF1A       | 1 |
| G0:0042759 | long-chain fatty acid biosynthetic process                                                 | 34/18866  | 0.012549271 | 0.02815482 | PTGS2       | 1 |
| G0:0045907 | positive regulation of vasoconstriction                                                    | 34/18866  | 0.012549271 | 0.02815482 | PTGS2       | 1 |
| G0:0055094 | response to lipoprotein particle                                                           | 34/18866  | 0.012549271 | 0.02815482 | PPARG       | 1 |
| G0:0070102 | interleukin-6-mediated signaling pathway                                                   | 34/18866  | 0.012549271 | 0.02815482 | STAT3       | 1 |

|            |                                                                                                              |           |             |            |             |   |
|------------|--------------------------------------------------------------------------------------------------------------|-----------|-------------|------------|-------------|---|
| G0:0070232 | regulation of T cell apoptotic process                                                                       | 34/18866  | 0.012549271 | 0.02815482 | HIF1A       | 1 |
| G0:1902692 | regulation of neuroblast proliferation                                                                       | 34/18866  | 0.012549271 | 0.02815482 | HIF1A       | 1 |
| G0:0042326 | negative regulation of phosphorylation                                                                       | 484/18866 | 0.012662743 | 0.02835708 | JUN/STAT3   | 2 |
| G0:0050769 | positive regulation of neurogenesis                                                                          | 485/18866 | 0.012712911 | 0.02840188 | HIF1A/PPARG | 2 |
| G0:0019362 | pyridine nucleotide metabolic process                                                                        | 35/18866  | 0.012916314 | 0.02840188 | PTGS2       | 1 |
| G0:0030947 | regulation of vascular endothelial growth factor receptor signaling pathway                                  | 35/18866  | 0.012916314 | 0.02840188 | HIF1A       | 1 |
| G0:0034390 | smooth muscle cell apoptotic process                                                                         | 35/18866  | 0.012916314 | 0.02840188 | PPARG       | 1 |
| G0:0034391 | regulation of smooth muscle cell apoptotic process                                                           | 35/18866  | 0.012916314 | 0.02840188 | PPARG       | 1 |
| G0:0046496 | nicotinamide nucleotide metabolic process                                                                    | 35/18866  | 0.012916314 | 0.02840188 | PTGS2       | 1 |
| G0:0070884 | regulation of calcineurin-NFAT signaling cascade                                                             | 35/18866  | 0.012916314 | 0.02840188 | GSK3B       | 1 |
| G0:0072525 | pyridine-containing compound biosynthetic process                                                            | 35/18866  | 0.012916314 | 0.02840188 | PTGS2       | 1 |
| G0:0097009 | energy homeostasis                                                                                           | 35/18866  | 0.012916314 | 0.02840188 | STAT3       | 1 |
| G0:1901030 | positive regulation of mitochondrial outer membrane permeabilization involved in apoptotic signaling pathway | 35/18866  | 0.012916314 | 0.02840188 | GSK3B       | 1 |
| G0:0016049 | cell growth                                                                                                  | 490/18866 | 0.012965101 | 0.0284577  | GSK3B/PPARG | 2 |
| G0:0001893 | maternal placenta development                                                                                | 36/18866  | 0.01328324  | 0.02879219 | PTGS2       | 1 |
| G0:0033280 | response to vitamin D                                                                                        | 36/18866  | 0.01328324  | 0.02879219 | PTGS2       | 1 |
| G0:0034405 | response to fluid shear stress                                                                               | 36/18866  | 0.01328324  | 0.02879219 | PTGS2       | 1 |
| G0:0043368 | positive T cell selection                                                                                    | 36/18866  | 0.01328324  | 0.02879219 | STAT3       | 1 |

|            |                                                                             |          |             |            |       |   |
|------------|-----------------------------------------------------------------------------|----------|-------------|------------|-------|---|
| G0:0070873 | regulation of glycogen metabolic process                                    | 36/18866 | 0.01328324  | 0.02879219 | GSK3B | 1 |
| G0:0071402 | cellular response to lipoprotein particle stimulus                          | 36/18866 | 0.01328324  | 0.02879219 | PPARG | 1 |
| G0:0106056 | regulation of calcineurin-mediated signaling                                | 36/18866 | 0.01328324  | 0.02879219 | GSK3B | 1 |
| G0:0090050 | positive regulation of cell migration involved in sprouting angiogenesis    | 37/18866 | 0.013650049 | 0.02948217 | PTGS2 | 1 |
| G0:0098926 | postsynaptic signal transduction                                            | 37/18866 | 0.013650049 | 0.02948217 | STAT3 | 1 |
| G0:0010661 | positive regulation of muscle cell apoptotic process                        | 38/18866 | 0.014016742 | 0.02990238 | PPARG | 1 |
| G0:0010742 | macrophage derived foam cell differentiation                                | 38/18866 | 0.014016742 | 0.02990238 | PPARG | 1 |
| G0:0032733 | positive regulation of interleukin-10 production                            | 38/18866 | 0.014016742 | 0.02990238 | STAT3 | 1 |
| G0:0032885 | regulation of polysaccharide biosynthetic process                           | 38/18866 | 0.014016742 | 0.02990238 | GSK3B | 1 |
| G0:0071276 | cellular response to cadmium ion                                            | 38/18866 | 0.014016742 | 0.02990238 | JUN   | 1 |
| G0:0090077 | foam cell differentiation                                                   | 38/18866 | 0.014016742 | 0.02990238 | PPARG | 1 |
| G0:2000144 | positive regulation of DNA-templated transcription, initiation              | 38/18866 | 0.014016742 | 0.02990238 | JUN   | 1 |
| G0:0060416 | response to growth hormone                                                  | 39/18866 | 0.014383317 | 0.03052376 | STAT3 | 1 |
| G0:1904706 | negative regulation of vascular associated smooth muscle cell proliferation | 39/18866 | 0.014383317 | 0.03052376 | PPARG | 1 |
| G0:2000279 | negative regulation of DNA biosynthetic process                             | 39/18866 | 0.014383317 | 0.03052376 | PPARG | 1 |
| G0:0042307 | positive regulation of protein import into nucleus                          | 40/18866 | 0.014749776 | 0.03108445 | PTGS2 | 1 |

|            |                                                                                         |          |             |            |       |   |
|------------|-----------------------------------------------------------------------------------------|----------|-------------|------------|-------|---|
| G0:0045740 | positive regulation of DNA replication                                                  | 40/18866 | 0.014749776 | 0.03108445 | JUN   | 1 |
| G0:0048713 | regulation of oligodendrocyte differentiation                                           | 40/18866 | 0.014749776 | 0.03108445 | PPARG | 1 |
| G0:1903427 | negative regulation of reactive oxygen species biosynthetic process                     | 40/18866 | 0.014749776 | 0.03108445 | STAT3 | 1 |
| G0:0007212 | dopamine receptor signaling pathway                                                     | 41/18866 | 0.015116118 | 0.03158282 | GSK3B | 1 |
| G0:0046825 | regulation of protein export from nucleus                                               | 41/18866 | 0.015116118 | 0.03158282 | GSK3B | 1 |
| G0:0050434 | positive regulation of viral transcription                                              | 41/18866 | 0.015116118 | 0.03158282 | JUN   | 1 |
| G0:0072524 | pyridine-containing compound metabolic process                                          | 41/18866 | 0.015116118 | 0.03158282 | PTGS2 | 1 |
| G0:1902042 | negative regulation of extrinsic apoptotic signaling pathway via death domain receptors | 41/18866 | 0.015116118 | 0.03158282 | GSK3B | 1 |
| G0:0071470 | cellular response to osmotic stress                                                     | 42/18866 | 0.015482343 | 0.03207245 | PTGS2 | 1 |
| G0:0098760 | response to interleukin-7                                                               | 42/18866 | 0.015482343 | 0.03207245 | STAT3 | 1 |
| G0:0098761 | cellular response to interleukin-7                                                      | 42/18866 | 0.015482343 | 0.03207245 | STAT3 | 1 |
| G0:1900371 | regulation of purine nucleotide biosynthetic process                                    | 42/18866 | 0.015482343 | 0.03207245 | STAT3 | 1 |
| G0:1904591 | positive regulation of protein import                                                   | 42/18866 | 0.015482343 | 0.03207245 | PTGS2 | 1 |
| G0:0008631 | intrinsic apoptotic signaling pathway in response to oxidative stress                   | 43/18866 | 0.015848451 | 0.03255358 | HIF1A | 1 |

|            |                                                                                                     |          |             |            |       |   |
|------------|-----------------------------------------------------------------------------------------------------|----------|-------------|------------|-------|---|
| G0:0030808 | regulation of nucleotide biosynthetic process                                                       | 43/18866 | 0.015848451 | 0.03255358 | STAT3 | 1 |
| G0:0150077 | regulation of neuroinflammatory response                                                            | 43/18866 | 0.015848451 | 0.03255358 | PTGS2 | 1 |
| G0:1903146 | regulation of autophagy of mitochondrion                                                            | 43/18866 | 0.015848451 | 0.03255358 | HIF1A | 1 |
| G0:2000648 | positive regulation of stem cell proliferation                                                      | 43/18866 | 0.015848451 | 0.03255358 | HIF1A | 1 |
| G0:0031670 | cellular response to nutrient                                                                       | 44/18866 | 0.016214443 | 0.0330264  | PPARG | 1 |
| G0:0032881 | regulation of polysaccharide metabolic process                                                      | 44/18866 | 0.016214443 | 0.0330264  | GSK3B | 1 |
| G0:0032965 | regulation of collagen biosynthetic process                                                         | 44/18866 | 0.016214443 | 0.0330264  | PPARG | 1 |
| G0:0033173 | calcineurin-NFAT signaling cascade                                                                  | 44/18866 | 0.016214443 | 0.0330264  | GSK3B | 1 |
| G0:0045687 | positive regulation of glial cell differentiation                                                   | 44/18866 | 0.016214443 | 0.0330264  | PPARG | 1 |
| G0:0031018 | endocrine pancreas development                                                                      | 45/18866 | 0.016580318 | 0.0334356  | GSK3B | 1 |
| G0:0032722 | positive regulation of chemokine production                                                         | 45/18866 | 0.016580318 | 0.0334356  | HIF1A | 1 |
| G0:0045429 | positive regulation of nitric oxide biosynthetic process                                            | 45/18866 | 0.016580318 | 0.0334356  | PTGS2 | 1 |
| G0:1901028 | regulation of mitochondrial outer membrane permeabilization involved in apoptotic signaling pathway | 45/18866 | 0.016580318 | 0.0334356  | GSK3B | 1 |
| G0:1904646 | cellular response to amyloid-beta                                                                   | 45/18866 | 0.016580318 | 0.0334356  | GSK3B | 1 |
| G0:2001222 | regulation of neuron migration                                                                      | 45/18866 | 0.016580318 | 0.0334356  | STAT3 | 1 |
| G0:0001754 | eye photoreceptor cell differentiation                                                              | 46/18866 | 0.016946076 | 0.03378103 | STAT3 | 1 |
| G0:0005978 | glycogen biosynthetic process                                                                       | 46/18866 | 0.016946076 | 0.03378103 | GSK3B | 1 |
| G0:0009250 | glucan biosynthetic process                                                                         | 46/18866 | 0.016946076 | 0.03378103 | GSK3B | 1 |

|            |                                                          |          |             |            |       |   |
|------------|----------------------------------------------------------|----------|-------------|------------|-------|---|
| G0:0032007 | negative regulation of TOR signaling                     | 46/18866 | 0.016946076 | 0.03378103 | HIF1A | 1 |
| G0:0051646 | mitochondrion localization                               | 46/18866 | 0.016946076 | 0.03378103 | HIF1A | 1 |
| G0:1904407 | positive regulation of nitric oxide metabolic process    | 46/18866 | 0.016946076 | 0.03378103 | PTGS2 | 1 |
| G0:2000142 | regulation of DNA-templated transcription, initiation    | 46/18866 | 0.016946076 | 0.03378103 | JUN   | 1 |
| G0:0008542 | visual learning                                          | 47/18866 | 0.017311718 | 0.03439714 | HIF1A | 1 |
| G0:0045933 | positive regulation of muscle contraction                | 47/18866 | 0.017311718 | 0.03439714 | PTGS2 | 1 |
| G0:0009409 | response to cold                                         | 48/18866 | 0.017677243 | 0.03489534 | PPARG | 1 |
| G0:0031952 | regulation of protein autophosphorylation                | 48/18866 | 0.017677243 | 0.03489534 | JUN   | 1 |
| G0:0051972 | regulation of telomerase activity                        | 48/18866 | 0.017677243 | 0.03489534 | PPARG | 1 |
| G0:1900271 | regulation of long-term synaptic potentiation            | 48/18866 | 0.017677243 | 0.03489534 | GSK3B | 1 |
| G0:0002067 | glandular epithelial cell differentiation                | 49/18866 | 0.018042652 | 0.03504771 | GSK3B | 1 |
| G0:0006692 | prostanoid metabolic process                             | 49/18866 | 0.018042652 | 0.03504771 | PTGS2 | 1 |
| G0:0006693 | prostaglandin metabolic process                          | 49/18866 | 0.018042652 | 0.03504771 | PTGS2 | 1 |
| G0:0007595 | lactation                                                | 49/18866 | 0.018042652 | 0.03504771 | HIF1A | 1 |
| G0:0010712 | regulation of collagen metabolic process                 | 49/18866 | 0.018042652 | 0.03504771 | PPARG | 1 |
| G0:0035196 | production of miRNAs involved in gene silencing by miRNA | 49/18866 | 0.018042652 | 0.03504771 | STAT3 | 1 |
| G0:0045058 | T cell selection                                         | 49/18866 | 0.018042652 | 0.03504771 | STAT3 | 1 |
| G0:0070231 | T cell apoptotic process                                 | 49/18866 | 0.018042652 | 0.03504771 | HIF1A | 1 |
| G0:0097720 | calcineurin-mediated signaling                           | 49/18866 | 0.018042652 | 0.03504771 | GSK3B | 1 |
| G0:2000107 | negative regulation of leukocyte apoptotic process       | 49/18866 | 0.018042652 | 0.03504771 | HIF1A | 1 |
| G0:0001774 | microglial cell activation                               | 50/18866 | 0.018407944 | 0.03547395 | JUN   | 1 |

|            |                                                                             |          |             |            |       |   |
|------------|-----------------------------------------------------------------------------|----------|-------------|------------|-------|---|
| GO:0002269 | leukocyte activation involved in inflammatory response                      | 50/18866 | 0.018407944 | 0.03547395 | JUN   | 1 |
| GO:0048546 | digestive tract morphogenesis                                               | 50/18866 | 0.018407944 | 0.03547395 | HIF1A | 1 |
| GO:0050873 | brown fat cell differentiation                                              | 50/18866 | 0.018407944 | 0.03547395 | PTGS2 | 1 |
| GO:1904707 | positive regulation of vascular associated smooth muscle cell proliferation | 50/18866 | 0.018407944 | 0.03547395 | JUN   | 1 |
| GO:0006984 | ER-nucleus signaling pathway                                                | 51/18866 | 0.018773119 | 0.03600649 | GSK3B | 1 |
| GO:0048146 | positive regulation of fibroblast proliferation                             | 51/18866 | 0.018773119 | 0.03600649 | JUN   | 1 |
| GO:0071354 | cellular response to interleukin-6                                          | 51/18866 | 0.018773119 | 0.03600649 | STAT3 | 1 |
| GO:0010883 | regulation of lipid storage                                                 | 52/18866 | 0.019138178 | 0.03653379 | PPARG | 1 |
| GO:0031103 | axon regeneration                                                           | 52/18866 | 0.019138178 | 0.03653379 | JUN   | 1 |
| GO:0050999 | regulation of nitric-oxide synthase activity                                | 52/18866 | 0.019138178 | 0.03653379 | HIF1A | 1 |
| GO:0007632 | visual behavior                                                             | 53/18866 | 0.019503121 | 0.03699812 | HIF1A | 1 |
| GO:0032964 | collagen biosynthetic process                                               | 53/18866 | 0.019503121 | 0.03699812 | PPARG | 1 |
| GO:0043392 | negative regulation of DNA binding                                          | 53/18866 | 0.019503121 | 0.03699812 | JUN   | 1 |
| GO:0072698 | protein localization to microtubule cytoskeleton                            | 53/18866 | 0.019503121 | 0.03699812 | GSK3B | 1 |
| GO:0006754 | ATP biosynthetic process                                                    | 54/18866 | 0.019867948 | 0.03734069 | STAT3 | 1 |
| GO:0030857 | negative regulation of epithelial cell differentiation                      | 54/18866 | 0.019867948 | 0.03734069 | GSK3B | 1 |
| GO:0031050 | dsRNA processing                                                            | 54/18866 | 0.019867948 | 0.03734069 | STAT3 | 1 |
| GO:0032757 | positive regulation of interleukin-8 production                             | 54/18866 | 0.019867948 | 0.03734069 | STAT3 | 1 |
| GO:0070918 | production of small RNA involved in gene silencing by RNA                   | 54/18866 | 0.019867948 | 0.03734069 | STAT3 | 1 |

|            |                                                                                   |          |             |            |       |   |
|------------|-----------------------------------------------------------------------------------|----------|-------------|------------|-------|---|
| G0:2000179 | positive regulation of neural precursor cell proliferation                        | 54/18866 | 0.019867948 | 0.03734069 | HIF1A | 1 |
| G0:0001954 | positive regulation of cell-matrix adhesion                                       | 55/18866 | 0.020232657 | 0.03773453 | GSK3B | 1 |
| G0:0042304 | regulation of fatty acid biosynthetic process                                     | 55/18866 | 0.020232657 | 0.03773453 | PTGS2 | 1 |
| G0:0051353 | positive regulation of oxidoreductase activity                                    | 55/18866 | 0.020232657 | 0.03773453 | HIF1A | 1 |
| G0:0070741 | response to interleukin-6                                                         | 55/18866 | 0.020232657 | 0.03773453 | STAT3 | 1 |
| G0:0097345 | mitochondrial outer membrane permeabilization                                     | 55/18866 | 0.020232657 | 0.03773453 | GSK3B | 1 |
| G0:0001755 | neural crest cell migration                                                       | 56/18866 | 0.020597251 | 0.03823856 | HIF1A | 1 |
| G0:0070228 | regulation of lymphocyte apoptotic process                                        | 56/18866 | 0.020597251 | 0.03823856 | HIF1A | 1 |
| G0:1904645 | response to amyloid-beta                                                          | 56/18866 | 0.020597251 | 0.03823856 | GSK3B | 1 |
| G0:0042743 | hydrogen peroxide metabolic process                                               | 57/18866 | 0.020961729 | 0.03856197 | STAT3 | 1 |
| G0:0044380 | protein localization to cytoskeleton                                              | 57/18866 | 0.020961729 | 0.03856197 | GSK3B | 1 |
| G0:0045747 | positive regulation of Notch signaling pathway                                    | 57/18866 | 0.020961729 | 0.03856197 | STAT3 | 1 |
| G0:0048016 | inositol phosphate-mediated signaling                                             | 57/18866 | 0.020961729 | 0.03856197 | GSK3B | 1 |
| G0:0061178 | regulation of insulin secretion involved in cellular response to glucose stimulus | 57/18866 | 0.020961729 | 0.03856197 | HIF1A | 1 |
| G0:0071398 | cellular response to fatty acid                                                   | 57/18866 | 0.020961729 | 0.03856197 | PPARG | 1 |
| G0:0002763 | positive regulation of myeloid leukocyte differentiation                          | 58/18866 | 0.02132609  | 0.03893773 | JUN   | 1 |
| G0:0007566 | embryo implantation                                                               | 58/18866 | 0.02132609  | 0.03893773 | PTGS2 | 1 |
| G0:0019369 | arachidonic acid metabolic process                                                | 58/18866 | 0.02132609  | 0.03893773 | PTGS2 | 1 |



|            |                                                                     |          |             |            |       |   |
|------------|---------------------------------------------------------------------|----------|-------------|------------|-------|---|
| G0:1900408 | negative regulation of cellular response to oxidative stress        | 58/18866 | 0.02132609  | 0.03893773 | HIF1A | 1 |
| G0:1903202 | negative regulation of oxidative stress-induced cell death          | 58/18866 | 0.02132609  | 0.03893773 | HIF1A | 1 |
| G0:0006636 | unsaturated fatty acid biosynthetic process                         | 59/18866 | 0.021690334 | 0.03924918 | PTGS2 | 1 |
| G0:0031102 | neuron projection regeneration                                      | 59/18866 | 0.021690334 | 0.03924918 | JUN   | 1 |
| G0:0042306 | regulation of protein import into nucleus                           | 59/18866 | 0.021690334 | 0.03924918 | PTGS2 | 1 |
| G0:0043525 | positive regulation of neuron apoptotic process                     | 59/18866 | 0.021690334 | 0.03924918 | JUN   | 1 |
| G0:0046456 | icosanoid biosynthetic process                                      | 59/18866 | 0.021690334 | 0.03924918 | PTGS2 | 1 |
| G0:0098930 | axonal transport                                                    | 59/18866 | 0.021690334 | 0.03924918 | HIF1A | 1 |
| G0:0001836 | release of cytochrome c from mitochondria                           | 60/18866 | 0.022054463 | 0.03938066 | JUN   | 1 |
| G0:0019229 | regulation of vasoconstriction                                      | 60/18866 | 0.022054463 | 0.03938066 | PTGS2 | 1 |
| G0:0032515 | negative regulation of phosphoprotein phosphatase activity          | 60/18866 | 0.022054463 | 0.03938066 | GSK3B | 1 |
| G0:0032653 | regulation of interleukin-10 production                             | 60/18866 | 0.022054463 | 0.03938066 | STAT3 | 1 |
| G0:0042093 | T-helper cell differentiation                                       | 60/18866 | 0.022054463 | 0.03938066 | STAT3 | 1 |
| G0:0043388 | positive regulation of DNA binding                                  | 60/18866 | 0.022054463 | 0.03938066 | PPARG | 1 |
| G0:0061900 | glial cell activation                                               | 60/18866 | 0.022054463 | 0.03938066 | JUN   | 1 |
| G0:1902883 | negative regulation of response to oxidative stress                 | 60/18866 | 0.022054463 | 0.03938066 | HIF1A | 1 |
| G0:1903428 | positive regulation of reactive oxygen species biosynthetic process | 60/18866 | 0.022054463 | 0.03938066 | PTGS2 | 1 |

|            |                                                                                          |          |             |            |       |   |
|------------|------------------------------------------------------------------------------------------|----------|-------------|------------|-------|---|
| GO:1902041 | regulation of extrinsic apoptotic signaling pathway via death domain receptors           | 61/18866 | 0.022418476 | 0.03991342 | GSK3B | 1 |
| GO:1902110 | positive regulation of mitochondrial membrane permeability involved in apoptotic process | 61/18866 | 0.022418476 | 0.03991342 | GSK3B | 1 |
| GO:0002260 | lymphocyte homeostasis                                                                   | 62/18866 | 0.022782372 | 0.0401498  | HIF1A | 1 |
| GO:0002294 | CD4-positive, alpha-beta T cell differentiation involved in immune response              | 62/18866 | 0.022782372 | 0.0401498  | STAT3 | 1 |
| GO:0007405 | neuroblast proliferation                                                                 | 62/18866 | 0.022782372 | 0.0401498  | HIF1A | 1 |
| GO:0010803 | regulation of tumor necrosis factor-mediated signaling pathway                           | 62/18866 | 0.022782372 | 0.0401498  | CASP1 | 1 |
| GO:0045824 | negative regulation of innate immune response                                            | 62/18866 | 0.022782372 | 0.0401498  | PPARG | 1 |
| GO:0051851 | modulation by host of symbiont process                                                   | 62/18866 | 0.022782372 | 0.0401498  | JUN   | 1 |
| GO:1904589 | regulation of protein import                                                             | 62/18866 | 0.022782372 | 0.0401498  | PTGS2 | 1 |
| GO:0002287 | alpha-beta T cell activation involved in immune response                                 | 63/18866 | 0.023146152 | 0.04049744 | STAT3 | 1 |
| GO:0002293 | alpha-beta T cell differentiation involved in immune response                            | 63/18866 | 0.023146152 | 0.04049744 | STAT3 | 1 |
| GO:0032613 | interleukin-10 production                                                                | 63/18866 | 0.023146152 | 0.04049744 | STAT3 | 1 |
| GO:0046530 | photoreceptor cell differentiation                                                       | 63/18866 | 0.023146152 | 0.04049744 | STAT3 | 1 |
| GO:1902686 | mitochondrial outer membrane permeabilization involved in programmed cell death          | 63/18866 | 0.023146152 | 0.04049744 | GSK3B | 1 |
| GO:0001947 | heart looping                                                                            | 64/18866 | 0.023509816 | 0.04089834 | HIF1A | 1 |
| GO:0046686 | response to cadmium ion                                                                  | 64/18866 | 0.023509816 | 0.04089834 | JUN   | 1 |

|            |                                                                                 |          |             |            |       |   |
|------------|---------------------------------------------------------------------------------|----------|-------------|------------|-------|---|
| G0:0051926 | negative regulation of calcium ion transport                                    | 64/18866 | 0.023509816 | 0.04089834 | PTGS2 | 1 |
| G0:0060135 | maternal process involved in female pregnancy                                   | 64/18866 | 0.023509816 | 0.04089834 | PTGS2 | 1 |
| G0:0006940 | regulation of smooth muscle contraction                                         | 65/18866 | 0.023873364 | 0.041119   | PTGS2 | 1 |
| G0:0009206 | purine ribonucleoside triphosphate biosynthetic process                         | 65/18866 | 0.023873364 | 0.041119   | STAT3 | 1 |
| G0:0035308 | negative regulation of protein dephosphorylation                                | 65/18866 | 0.023873364 | 0.041119   | GSK3B | 1 |
| G0:0035773 | insulin secretion involved in cellular response to glucose stimulus             | 65/18866 | 0.023873364 | 0.041119   | HIF1A | 1 |
| G0:0035794 | positive regulation of mitochondrial membrane permeability                      | 65/18866 | 0.023873364 | 0.041119   | GSK3B | 1 |
| G0:0046782 | regulation of viral transcription                                               | 65/18866 | 0.023873364 | 0.041119   | JUN   | 1 |
| G0:1905953 | negative regulation of lipid localization                                       | 65/18866 | 0.023873364 | 0.041119   | PPARG | 1 |
| G0:0009145 | purine nucleoside triphosphate biosynthetic process                             | 66/18866 | 0.024236797 | 0.04156833 | STAT3 | 1 |
| G0:0032768 | regulation of monooxygenase activity                                            | 66/18866 | 0.024236797 | 0.04156833 | HIF1A | 1 |
| G0:1902108 | regulation of mitochondrial membrane permeability involved in apoptotic process | 66/18866 | 0.024236797 | 0.04156833 | GSK3B | 1 |
| G0:0071300 | cellular response to retinoic acid                                              | 67/18866 | 0.024600113 | 0.04195475 | PPARG | 1 |
| G0:1900015 | regulation of cytokine production involved in inflammatory response             | 67/18866 | 0.024600113 | 0.04195475 | STAT3 | 1 |

|            |                                                         |          |             |            |       |   |
|------------|---------------------------------------------------------|----------|-------------|------------|-------|---|
| G0:1903672 | positive regulation of sprouting angiogenesis           | 67/18866 | 0.024600113 | 0.04195475 | PTGS2 | 1 |
| G0:1905710 | positive regulation of membrane permeability            | 67/18866 | 0.024600113 | 0.04195475 | GSK3B | 1 |
| G0:0016239 | positive regulation of macroautophagy                   | 68/18866 | 0.024963313 | 0.0422189  | HIF1A | 1 |
| G0:0032642 | regulation of chemokine production                      | 68/18866 | 0.024963313 | 0.0422189  | HIF1A | 1 |
| G0:0040014 | regulation of multicellular organism growth             | 68/18866 | 0.024963313 | 0.0422189  | STAT3 | 1 |
| G0:0042446 | hormone biosynthetic process                            | 68/18866 | 0.024963313 | 0.0422189  | HIF1A | 1 |
| G0:0045428 | regulation of nitric oxide biosynthetic process         | 68/18866 | 0.024963313 | 0.0422189  | PTGS2 | 1 |
| G0:0050766 | positive regulation of phagocytosis                     | 68/18866 | 0.024963313 | 0.0422189  | PPARG | 1 |
| G0:0048662 | negative regulation of smooth muscle cell proliferation | 69/18866 | 0.025326397 | 0.04271415 | PPARG | 1 |
| G0:0061371 | determination of heart left/right asymmetry             | 69/18866 | 0.025326397 | 0.04271415 | HIF1A | 1 |
| G0:0002534 | cytokine production involved in inflammatory response   | 70/18866 | 0.025689365 | 0.04302792 | STAT3 | 1 |
| G0:0003143 | embryonic heart tube morphogenesis                      | 70/18866 | 0.025689365 | 0.04302792 | HIF1A | 1 |
| G0:0006879 | cellular iron ion homeostasis                           | 70/18866 | 0.025689365 | 0.04302792 | HIF1A | 1 |
| G0:0008088 | axo-dendritic transport                                 | 70/18866 | 0.025689365 | 0.04302792 | HIF1A | 1 |
| G0:0050795 | regulation of behavior                                  | 70/18866 | 0.025689365 | 0.04302792 | STAT3 | 1 |
| G0:0002292 | T cell differentiation involved in immune response      | 71/18866 | 0.026052218 | 0.04321896 | STAT3 | 1 |
| G0:0009201 | ribonucleoside triphosphate biosynthetic process        | 71/18866 | 0.026052218 | 0.04321896 | STAT3 | 1 |
| G0:0014823 | response to activity                                    | 71/18866 | 0.026052218 | 0.04321896 | HIF1A | 1 |
| G0:0032371 | regulation of sterol transport                          | 71/18866 | 0.026052218 | 0.04321896 | PPARG | 1 |

|            |                                                                 |          |             |            |       |   |
|------------|-----------------------------------------------------------------|----------|-------------|------------|-------|---|
| G0:0033692 | cellular polysaccharide biosynthetic process                    | 71/18866 | 0.026052218 | 0.04321896 | GSK3B | 1 |
| G0:0042531 | positive regulation of tyrosine phosphorylation of STAT protein | 71/18866 | 0.026052218 | 0.04321896 | STAT3 | 1 |
| G0:0061180 | mammary gland epithelium development                            | 71/18866 | 0.026052218 | 0.04321896 | HIF1A | 1 |
| G0:0003208 | cardiac ventricle morphogenesis                                 | 73/18866 | 0.026777575 | 0.04418118 | HIF1A | 1 |
| G0:0005977 | glycogen metabolic process                                      | 73/18866 | 0.026777575 | 0.04418118 | GSK3B | 1 |
| G0:0051966 | regulation of synaptic transmission, glutamatergic              | 73/18866 | 0.026777575 | 0.04418118 | PTGS2 | 1 |
| G0:0070227 | lymphocyte apoptotic process                                    | 73/18866 | 0.026777575 | 0.04418118 | HIF1A | 1 |
| G0:0006073 | cellular glucan metabolic process                               | 74/18866 | 0.02714008  | 0.04459067 | GSK3B | 1 |
| G0:0032024 | positive regulation of insulin secretion                        | 74/18866 | 0.02714008  | 0.04459067 | HIF1A | 1 |
| G0:0044042 | glucan metabolic process                                        | 74/18866 | 0.02714008  | 0.04459067 | GSK3B | 1 |
| G0:0015909 | long-chain fatty acid transport                                 | 75/18866 | 0.027502469 | 0.04459067 | PPARG | 1 |
| G0:0031100 | animal organ regeneration                                       | 75/18866 | 0.027502469 | 0.04459067 | PPARG | 1 |
| G0:0032602 | chemokine production                                            | 75/18866 | 0.027502469 | 0.04459067 | HIF1A | 1 |
| G0:0035019 | somatic stem cell population maintenance                        | 75/18866 | 0.027502469 | 0.04459067 | STAT3 | 1 |
| G0:0038034 | signal transduction in absence of ligand                        | 75/18866 | 0.027502469 | 0.04459067 | GSK3B | 1 |
| G0:0043627 | response to estrogen                                            | 75/18866 | 0.027502469 | 0.04459067 | PPARG | 1 |
| G0:0045685 | regulation of glial cell differentiation                        | 75/18866 | 0.027502469 | 0.04459067 | PPARG | 1 |
| G0:0050805 | negative regulation of synaptic transmission                    | 75/18866 | 0.027502469 | 0.04459067 | PTGS2 | 1 |
| G0:0097192 | extrinsic apoptotic signaling pathway in absence of ligand      | 75/18866 | 0.027502469 | 0.04459067 | GSK3B | 1 |

|            |                                                                                    |          |             |            |       |   |
|------------|------------------------------------------------------------------------------------|----------|-------------|------------|-------|---|
| G0:1901983 | regulation of protein acetylation                                                  | 75/18866 | 0.027502469 | 0.04459067 | GSK3B | 1 |
| G0:0008306 | associative learning                                                               | 76/18866 | 0.027864743 | 0.04499804 | HIF1A | 1 |
| G0:0072091 | regulation of stem cell proliferation                                              | 76/18866 | 0.027864743 | 0.04499804 | HIF1A | 1 |
| G0:1903524 | positive regulation of blood circulation                                           | 76/18866 | 0.027864743 | 0.04499804 | PTGS2 | 1 |
| G0:0014015 | positive regulation of gliogenesis                                                 | 77/18866 | 0.028226901 | 0.04534202 | PPARG | 1 |
| G0:0030500 | regulation of bone mineralization                                                  | 77/18866 | 0.028226901 | 0.04534202 | HIF1A | 1 |
| G0:0061418 | regulation of transcription from RNA polymerase II promoter in response to hypoxia | 77/18866 | 0.028226901 | 0.04534202 | HIF1A | 1 |
| G0:1903201 | regulation of oxidative stress-induced cell death                                  | 77/18866 | 0.028226901 | 0.04534202 | HIF1A | 1 |
| G0:0000271 | polysaccharide biosynthetic process                                                | 78/18866 | 0.028588943 | 0.0456822  | GSK3B | 1 |
| G0:0042310 | vasoconstriction                                                                   | 78/18866 | 0.028588943 | 0.0456822  | PTGS2 | 1 |
| G0:0043367 | CD4-positive, alpha-beta T cell differentiation                                    | 78/18866 | 0.028588943 | 0.0456822  | STAT3 | 1 |
| G0:0060395 | SMAD protein signal transduction                                                   | 78/18866 | 0.028588943 | 0.0456822  | JUN   | 1 |
| G0:0000422 | autophagy of mitochondrion                                                         | 79/18866 | 0.02895087  | 0.04589864 | HIF1A | 1 |
| G0:0006809 | nitric oxide biosynthetic process                                                  | 79/18866 | 0.02895087  | 0.04589864 | PTGS2 | 1 |
| G0:0009205 | purine ribonucleoside triphosphate metabolic process                               | 79/18866 | 0.02895087  | 0.04589864 | STAT3 | 1 |
| G0:0031016 | pancreas development                                                               | 79/18866 | 0.02895087  | 0.04589864 | GSK3B | 1 |
| G0:0061726 | mitochondrion disassembly                                                          | 79/18866 | 0.02895087  | 0.04589864 | HIF1A | 1 |
| G0:1900034 | regulation of cellular response to heat                                            | 79/18866 | 0.02895087  | 0.04589864 | GSK3B | 1 |

|            |                                                            |          |             |            |       |   |
|------------|------------------------------------------------------------|----------|-------------|------------|-------|---|
| G0:0014032 | neural crest cell development                              | 80/18866 | 0.029312681 | 0.04617127 | HIF1A | 1 |
| G0:0035050 | embryonic heart tube development                           | 80/18866 | 0.029312681 | 0.04617127 | HIF1A | 1 |
| G0:0048678 | response to axon injury                                    | 80/18866 | 0.029312681 | 0.04617127 | JUN   | 1 |
| G0:1900182 | positive regulation of protein localization to nucleus     | 80/18866 | 0.029312681 | 0.04617127 | PTGS2 | 1 |
| G0:2000300 | regulation of synaptic vesicle exocytosis                  | 80/18866 | 0.029312681 | 0.04617127 | GSK3B | 1 |
| G0:0001937 | negative regulation of endothelial cell proliferation      | 81/18866 | 0.029674376 | 0.04644021 | PPARG | 1 |
| G0:0001960 | negative regulation of cytokine-mediated signaling pathway | 81/18866 | 0.029674376 | 0.04644021 | PPARG | 1 |
| G0:0019915 | lipid storage                                              | 81/18866 | 0.029674376 | 0.04644021 | PPARG | 1 |
| G0:0021766 | hippocampus development                                    | 81/18866 | 0.029674376 | 0.04644021 | GSK3B | 1 |
| G0:0034644 | cellular response to UV                                    | 81/18866 | 0.029674376 | 0.04644021 | PTGS2 | 1 |
| G0:0009142 | nucleoside triphosphate biosynthetic process               | 82/18866 | 0.030035956 | 0.04694566 | STAT3 | 1 |
| G0:0014855 | striated muscle cell proliferation                         | 83/18866 | 0.030397421 | 0.04732812 | STAT3 | 1 |
| G0:0048708 | astrocyte differentiation                                  | 83/18866 | 0.030397421 | 0.04732812 | STAT3 | 1 |
| G0:0071277 | cellular response to calcium ion                           | 83/18866 | 0.030397421 | 0.04732812 | JUN   | 1 |
| G0:0014031 | mesenchymal cell development                               | 84/18866 | 0.03075877  | 0.04758609 | HIF1A | 1 |
| G0:0030279 | negative regulation of ossification                        | 84/18866 | 0.03075877  | 0.04758609 | HIF1A | 1 |
| G0:0045913 | positive regulation of carbohydrate metabolic process      | 84/18866 | 0.03075877  | 0.04758609 | HIF1A | 1 |
| G0:0046209 | nitric oxide metabolic process                             | 84/18866 | 0.03075877  | 0.04758609 | PTGS2 | 1 |
| G0:0048864 | stem cell development                                      | 84/18866 | 0.03075877  | 0.04758609 | HIF1A | 1 |
| G0:0006970 | response to osmotic stress                                 | 85/18866 | 0.031120003 | 0.04778021 | PTGS2 | 1 |
| G0:0009199 | ribonucleoside triphosphate metabolic process              | 85/18866 | 0.031120003 | 0.04778021 | STAT3 | 1 |

|            |                                                                                           |          |             |            |       |   |
|------------|-------------------------------------------------------------------------------------------|----------|-------------|------------|-------|---|
| G0:0010507 | negative regulation of autophagy                                                          | 85/18866 | 0.031120003 | 0.04778021 | STAT3 | 1 |
| G0:0032092 | positive regulation of protein binding                                                    | 85/18866 | 0.031120003 | 0.04778021 | GSK3B | 1 |
| G0:0043154 | negative regulation of cysteine-type endopeptidase activity involved in apoptotic process | 85/18866 | 0.031120003 | 0.04778021 | PTGS2 | 1 |
| G0:0072384 | organelle transport along microtubule                                                     | 85/18866 | 0.031120003 | 0.04778021 | HIF1A | 1 |
| G0:0001776 | leukocyte homeostasis                                                                     | 86/18866 | 0.031481121 | 0.04791119 | HIF1A | 1 |
| G0:0006112 | energy reserve metabolic process                                                          | 86/18866 | 0.031481121 | 0.04791119 | GSK3B | 1 |
| G0:0006919 | activation of cysteine-type endopeptidase activity involved in apoptotic process          | 86/18866 | 0.031481121 | 0.04791119 | PPARG | 1 |
| G0:0034637 | cellular carbohydrate biosynthetic process                                                | 86/18866 | 0.031481121 | 0.04791119 | GSK3B | 1 |
| G0:0042509 | regulation of tyrosine phosphorylation of STAT protein                                    | 86/18866 | 0.031481121 | 0.04791119 | STAT3 | 1 |
| G0:0097756 | negative regulation of blood vessel diameter                                              | 86/18866 | 0.031481121 | 0.04791119 | PTGS2 | 1 |
| G0:2000106 | regulation of leukocyte apoptotic process                                                 | 86/18866 | 0.031481121 | 0.04791119 | HIF1A | 1 |
| G0:0009060 | aerobic respiration                                                                       | 87/18866 | 0.031842124 | 0.0479802  | HIF1A | 1 |
| G0:0009144 | purine nucleoside triphosphate metabolic process                                          | 87/18866 | 0.031842124 | 0.0479802  | STAT3 | 1 |
| G0:0032436 | positive regulation of proteasomal ubiquitin-dependent protein catabolic process          | 87/18866 | 0.031842124 | 0.0479802  | GSK3B | 1 |
| G0:0055072 | iron ion homeostasis                                                                      | 87/18866 | 0.031842124 | 0.0479802  | HIF1A | 1 |



|            |                                                                  |          |             |            |       |   |
|------------|------------------------------------------------------------------|----------|-------------|------------|-------|---|
| G0:0060291 | long-term synaptic potentiation                                  | 87/18866 | 0.031842124 | 0.0479802  | GSK3B | 1 |
| G0:0060761 | negative regulation of response to cytokine stimulus             | 87/18866 | 0.031842124 | 0.0479802  | PPARG | 1 |
| G0:0090049 | regulation of cell migration involved in sprouting angiogenesis  | 87/18866 | 0.031842124 | 0.0479802  | PTGS2 | 1 |
| G0:2001057 | reactive nitrogen species metabolic process                      | 87/18866 | 0.031842124 | 0.0479802  | PTGS2 | 1 |
| G0:0032755 | positive regulation of interleukin-6 production                  | 88/18866 | 0.032203012 | 0.04834427 | STAT3 | 1 |
| G0:0046889 | positive regulation of lipid biosynthetic process                | 88/18866 | 0.032203012 | 0.04834427 | PTGS2 | 1 |
| G0:0070098 | chemokine-mediated signaling pathway                             | 88/18866 | 0.032203012 | 0.04834427 | HIF1A | 1 |
| G0:0001892 | embryonic placenta development                                   | 89/18866 | 0.032563784 | 0.04858596 | HIF1A | 1 |
| G0:0007260 | tyrosine phosphorylation of STAT protein                         | 89/18866 | 0.032563784 | 0.04858596 | STAT3 | 1 |
| G0:0008625 | extrinsic apoptotic signaling pathway via death domain receptors | 89/18866 | 0.032563784 | 0.04858596 | GSK3B | 1 |
| G0:0014033 | neural crest cell differentiation                                | 89/18866 | 0.032563784 | 0.04858596 | HIF1A | 1 |
| G0:0043537 | negative regulation of blood vessel endothelial cell migration   | 89/18866 | 0.032563784 | 0.04858596 | PPARG | 1 |
| G0:0046427 | positive regulation of receptor signaling pathway via JAK-STAT   | 90/18866 | 0.032924441 | 0.04900382 | STAT3 | 1 |
| G0:1903351 | cellular response to dopamine                                    | 90/18866 | 0.032924441 | 0.04900382 | GSK3B | 1 |
| G0:0051899 | membrane depolarization                                          | 91/18866 | 0.033284982 | 0.0492391  | JUN   | 1 |
| G0:0060333 | interferon-gamma-mediated signaling pathway                      | 91/18866 | 0.033284982 | 0.0492391  | PPARG | 1 |

|            |                                                                    |          |             |            |       |   |
|------------|--------------------------------------------------------------------|----------|-------------|------------|-------|---|
| G0:0097306 | cellular response to alcohol                                       | 91/18866 | 0.033284982 | 0.0492391  | PPARG | 1 |
| G0:1903350 | response to dopamine                                               | 91/18866 | 0.033284982 | 0.0492391  | GSK3B | 1 |
| G0:2000177 | regulation of neural precursor cell proliferation                  | 91/18866 | 0.033284982 | 0.0492391  | HIF1A | 1 |
| G0:0106027 | neuron projection organization                                     | 92/18866 | 0.033645408 | 0.04965148 | GSK3B | 1 |
| G0:1900407 | regulation of cellular response to oxidative stress                | 92/18866 | 0.033645408 | 0.04965148 | HIF1A | 1 |
| G0:0002532 | production of molecular mediator involved in inflammatory response | 93/18866 | 0.03400572  | 0.04988053 | STAT3 | 1 |
| G0:0032677 | regulation of interleukin-8 production                             | 93/18866 | 0.03400572  | 0.04988053 | STAT3 | 1 |
| G0:0051702 | interaction with symbiont                                          | 93/18866 | 0.03400572  | 0.04988053 | JUN   | 1 |
| G0:1904894 | positive regulation of receptor signaling pathway via STAT         | 93/18866 | 0.03400572  | 0.04988053 | STAT3 | 1 |
| G0:2000117 | negative regulation of cysteine-type endopeptidase activity        | 93/18866 | 0.03400572  | 0.04988053 | PTGS2 | 1 |

Supplementary Table 4: GO Cell Components

| ID         | Description                                       | BgRatio   | pvalue      | p.adjust   | geneID                | Count |
|------------|---------------------------------------------------|-----------|-------------|------------|-----------------------|-------|
| G0:0090575 | RNA polymerase II transcription regulator complex | 161/19559 | 1.52E-07    | 5.01E-06   | HIF1A/JUN/PPARG/STAT3 | 4     |
| G0:0005667 | transcription regulator complex                   | 413/19559 | 6.52E-06    | 0.0001076  | HIF1A/JUN/PPARG/STAT3 | 4     |
| G0:0030877 | beta-catenin destruction complex                  | 12/19559  | 0.004287458 | 0.03537153 | GSK3B                 | 1     |
| G0:1990909 | Wnt signalosome                                   | 12/19559  | 0.004287458 | 0.03537153 | GSK3B                 | 1     |
| G0:0061702 | inflammasome complex                              | 17/19559  | 0.006069243 | 0.03690322 | CASP1                 | 1     |
| G0:0098978 | glutamatergic synapse                             | 361/19559 | 0.006709676 | 0.03690322 | GSK3B/STAT3           | 2     |
| G0:0005640 | nuclear outer membrane                            | 28/19559  | 0.009979552 | 0.04704646 | PTGS2                 | 1     |
| G0:0005719 | nuclear euchromatin                               | 34/19559  | 0.012106885 | 0.0499409  | JUN                   | 1     |

Supplementary Table 5: GO Molecular Functions

| ID         | Description                                  | BgRatio   | pvalue      | p. adjust  | geneID                    | Count |
|------------|----------------------------------------------|-----------|-------------|------------|---------------------------|-------|
| G0:0061629 | RNA polymerase II-specific DNA-binding trans | 267/18352 | 1.29E-08    | 1.12E-06   | GSK3B/HIF1A/JUN/PPARG/STA | 5     |
| G0:0140297 | DNA-binding transcription factor binding     | 347/18352 | 4.78E-08    | 2.08E-06   | GSK3B/HIF1A/JUN/PPARG/STA | 5     |
| G0:0035257 | nuclear hormone receptor binding             | 144/18352 | 1.62E-05    | 0.00046929 | HIF1A/PPARG/STAT3         | 3     |
| G0:0051427 | hormone receptor binding                     | 177/18352 | 3.00E-05    | 0.00065265 | HIF1A/PPARG/STAT3         | 3     |
| G0:0001103 | RNA polymerase II repressing transcription f | 35/18352  | 7.38E-05    | 0.00128342 | PPARG/STAT3               | 2     |
| G0:0031625 | ubiquitin protein ligase binding             | 297/18352 | 0.000139953 | 0.00146283 | GSK3B/HIF1A/JUN           | 3     |
| G0:0070888 | E-box binding                                | 50/18352  | 0.000151445 | 0.00146283 | HIF1A/PPARG               | 2     |
| G0:0004879 | nuclear receptor activity                    | 52/18352  | 0.000163871 | 0.00146283 | PPARG/STAT3               | 2     |
| G0:0098531 | ligand-activated transcription factor activi | 52/18352  | 0.000163871 | 0.00146283 | PPARG/STAT3               | 2     |
| G0:0044389 | ubiquitin-like protein ligase binding        | 316/18352 | 0.000168142 | 0.00146283 | GSK3B/HIF1A/JUN           | 3     |
| G0:0002039 | p53 binding                                  | 66/18352  | 0.000264412 | 0.00209126 | GSK3B/HIF1A               | 2     |
| G0:0070491 | repressing transcription factor binding      | 74/18352  | 0.000332465 | 0.00241037 | PPARG/STAT3               | 2     |
| G0:0033613 | activating transcription factor binding      | 80/18352  | 0.000388539 | 0.00247517 | JUN/PPARG                 | 2     |
| G0:0035258 | steroid hormone receptor binding             | 81/18352  | 0.000398303 | 0.00247517 | PPARG/STAT3               | 2     |
| G0:0016922 | nuclear receptor binding                     | 101/18352 | 0.000618557 | 0.00358763 | PPARG/STAT3               | 2     |
| G0:0019903 | protein phosphatase binding                  | 149/18352 | 0.001338785 | 0.00727964 | PPARG/STAT3               | 2     |
| G0:0019902 | phosphatase binding                          | 194/18352 | 0.002254554 | 0.01153801 | PPARG/STAT3               | 2     |
| G0:0004955 | prostaglandin receptor activity              | 10/18352  | 0.00380869  | 0.01743979 | PPARG                     | 1     |
| G0:0097199 | cysteine-type endopeptidase activity involve | 10/18352  | 0.00380869  | 0.01743979 | CASP1                     | 1     |
| G0:0004954 | prostanoid receptor activity                 | 11/18352  | 0.004188874 | 0.01795555 | PPARG                     | 1     |
| G0:0034452 | dynactin binding                             | 12/18352  | 0.004568934 | 0.01795555 | GSK3B                     | 1     |
| G0:0034236 | protein kinase A catalytic subunit binding   | 13/18352  | 0.00494887  | 0.01795555 | GSK3B                     | 1     |
| G0:0035497 | cAMP response element binding                | 14/18352  | 0.005328681 | 0.01795555 | JUN                       | 1     |
| G0:0004953 | icosanoid receptor activity                  | 15/18352  | 0.005708368 | 0.01795555 | PPARG                     | 1     |
| G0:0035259 | glucocorticoid receptor binding              | 15/18352  | 0.005708368 | 0.01795555 | STAT3                     | 1     |
| G0:0036041 | long-chain fatty acid binding                | 15/18352  | 0.005708368 | 0.01795555 | PPARG                     | 1     |
| G0:0097153 | cysteine-type endopeptidase activity involve | 15/18352  | 0.005708368 | 0.01795555 | CASP1                     | 1     |
| G0:0050700 | CARD domain binding                          | 16/18352  | 0.006087931 | 0.01795555 | CASP1                     | 1     |
| G0:0071837 | HMG box domain binding                       | 16/18352  | 0.006087931 | 0.01795555 | JUN                       | 1     |

|            |                                                       |             |            |           |   |
|------------|-------------------------------------------------------|-------------|------------|-----------|---|
| G0:0008656 | cysteine-type endopeptidase activator activi17/18352  | 0.006467369 | 0.01795555 | CASP1     | 1 |
| G0:0001227 | DNA-binding transcription repressor activity335/18352 | 0.006566229 | 0.01795555 | JUN/PPARG | 2 |
| G0:0001217 | DNA-binding transcription repressor activity336/18352 | 0.006604341 | 0.01795555 | JUN/PPARG | 2 |
| G0:0046965 | retinoid X receptor binding 18/18352                  | 0.006846684 | 0.01805035 | PPARG     | 1 |
| G0:0016505 | peptidase activator activity involved in apo20/18352  | 0.00760494  | 0.0194597  | CASP1     | 1 |
| G0:0050321 | tau-protein kinase activity 22/18352                  | 0.0083627   | 0.02078728 | GSK3B     | 1 |
| G0:0070412 | R-SMAD binding 23/18352                               | 0.008741394 | 0.02112504 | JUN       | 1 |
| G0:0016702 | oxidoreductase activity, acting on single do25/18352  | 0.00949841  | 0.02230447 | PTGS2     | 1 |
| G0:0016701 | oxidoreductase activity, acting on single do26/18352  | 0.009876732 | 0.02230447 | PTGS2     | 1 |
| G0:0042974 | retinoic acid receptor binding 27/18352               | 0.010254931 | 0.02230447 | PPARG     | 1 |
| G0:0051393 | alpha-actinin binding 27/18352                        | 0.010254931 | 0.02230447 | PPARG     | 1 |
| G0:0035035 | histone acetyltransferase binding 28/18352            | 0.010633005 | 0.02256272 | HIF1A     | 1 |
| G0:1901567 | fatty acid derivative binding 29/18352                | 0.011010956 | 0.02280841 | PPARG     | 1 |
| G0:0051059 | NF-kappaB binding 31/18352                            | 0.011766486 | 0.02380661 | GSK3B     | 1 |
| G0:0042805 | actinin binding 36/18352                              | 0.013653147 | 0.026996   | PPARG     | 1 |
| G0:0005504 | fatty acid binding 39/18352                           | 0.014783662 | 0.02858175 | PPARG     | 1 |
| G0:0016504 | peptidase activator activity 40/18352                 | 0.015160253 | 0.02867265 | CASP1     | 1 |
| G0:0030331 | estrogen receptor binding 42/18352                    | 0.015913065 | 0.02884243 | PPARG     | 1 |
| G0:0051879 | Hsp90 protein binding 42/18352                        | 0.015913065 | 0.02884243 | HIF1A     | 1 |
| G0:0043028 | cysteine-type endopeptidase regulator activi43/18352  | 0.016289286 | 0.02892179 | CASP1     | 1 |
| G0:0048156 | tau protein binding 45/18352                          | 0.017041359 | 0.02965196 | GSK3B     | 1 |
| G0:0001102 | RNA polymerase II activating transcription f47/18352  | 0.017792938 | 0.02976895 | JUN       | 1 |
| G0:0048020 | CCR chemokine receptor binding 47/18352               | 0.017792938 | 0.02976895 | STAT3     | 1 |
| G0:0051018 | protein kinase A binding 51/18352                     | 0.019294619 | 0.0316723  | GSK3B     | 1 |
| G0:0004601 | peroxidase activity 52/18352                          | 0.019669732 | 0.03169012 | PTGS2     | 1 |
| G0:0001085 | RNA polymerase II transcription factor bindi56/18352  | 0.021168953 | 0.03288211 | GSK3B     | 1 |
| G0:0016684 | oxidoreductase activity, acting on peroxide 56/18352  | 0.021168953 | 0.03288211 | PTGS2     | 1 |
| G0:0043621 | protein self-association 57/18352                     | 0.021543452 | 0.03288211 | PPARG     | 1 |
| G0:0042379 | chemokine receptor binding 70/18352                   | 0.026400763 | 0.03960114 | STAT3     | 1 |
| G0:0033293 | monocarboxylic acid binding 72/18352                  | 0.027146204 | 0.04002915 | PPARG     | 1 |
| G0:0046332 | SMAD binding 79/18352                                 | 0.029751396 | 0.04313952 | JUN       | 1 |
| G0:0008013 | beta-catenin binding 85/18352                         | 0.031979656 | 0.04539521 | GSK3B     | 1 |
| G0:0016209 | antioxidant activity 86/18352                         | 0.032350606 | 0.04539521 | PTGS2     | 1 |

G0:0051213 dioxygenase activity 91/18352 0.034203529 0.04723344 PTGS2 1

Supplementary Table 6: KEGG pathway

| ID       | Description                                  | BgRatio  | pvalue      | p.adjust   | geneID         | Count |
|----------|----------------------------------------------|----------|-------------|------------|----------------|-------|
| hsa04657 | IL-17 signaling pathway                      | 94/8096  | 5.13E-05    | 0.00151334 | 2932/3725/5743 | 3     |
| hsa04625 | C-type lectin receptor signaling pathway     | 104/8096 | 6.94E-05    | 0.00152858 | 834/3725/5743  | 3     |
| hsa04659 | Th17 cell differentiation                    | 108/8096 | 7.77E-05    | 0.00152858 | 3091/3725/6774 | 3     |
| hsa04917 | Prolactin signaling pathway                  | 70/8096  | 0.001504866 | 0.01173667 | 2932/6774      | 2     |
| hsa01521 | EGFR tyrosine kinase inhibitor resistance    | 79/8096  | 0.001912747 | 0.01187917 | 2932/6774      | 2     |
| hsa04662 | B cell receptor signaling pathway            | 82/8096  | 0.00205919  | 0.01213546 | 2932/3725      | 2     |
| hsa04012 | ErbB signaling pathway                       | 85/8096  | 0.00221084  | 0.01213546 | 2932/3725      | 2     |
| hsa04660 | T cell receptor signaling pathway            | 104/8096 | 0.003290925 | 0.01553316 | 2932/3725      | 2     |
| hsa04931 | Insulin resistance                           | 108/8096 | 0.003544348 | 0.01577312 | 2932/6774      | 2     |
| hsa04066 | HIF-1 signaling pathway                      | 109/8096 | 0.003609104 | 0.01577312 | 3091/6774      | 2     |
| hsa04668 | TNF signaling pathway                        | 112/8096 | 0.003806721 | 0.01604261 | 3725/5743      | 2     |
| hsa04722 | Neurotrophin signaling pathway               | 119/8096 | 0.004287272 | 0.01686085 | 2932/3725      | 2     |
| hsa04935 | Growth hormone synthesis, secretion and acti | 119/8096 | 0.004287272 | 0.01686085 | 2932/6774      | 2     |
| hsa04919 | Thyroid hormone signaling pathway            | 121/8096 | 0.004429546 | 0.01686085 | 2932/3091      | 2     |
| hsa04550 | Signaling pathways regulating pluripotency o | 143/8096 | 0.006138478 | 0.02194971 | 2932/6774      | 2     |
| hsa04921 | Oxytocin signaling pathway                   | 154/8096 | 0.007090372 | 0.02390468 | 3725/5743      | 2     |
| hsa04310 | Wnt signaling pathway                        | 166/8096 | 0.008201411 | 0.02481452 | 2932/3725      | 2     |
| hsa04621 | NOD-like receptor signaling pathway          | 185/8096 | 0.010112613 | 0.02983221 | 834/3725       | 2     |
| hsa04062 | Chemokine signaling pathway                  | 192/8096 | 0.010862926 | 0.03126403 | 2932/6774      | 2     |
| hsa04510 | Focal adhesion                               | 201/8096 | 0.011863578 | 0.03160651 | 2932/3725      | 2     |

## Related signaling pathway supplement

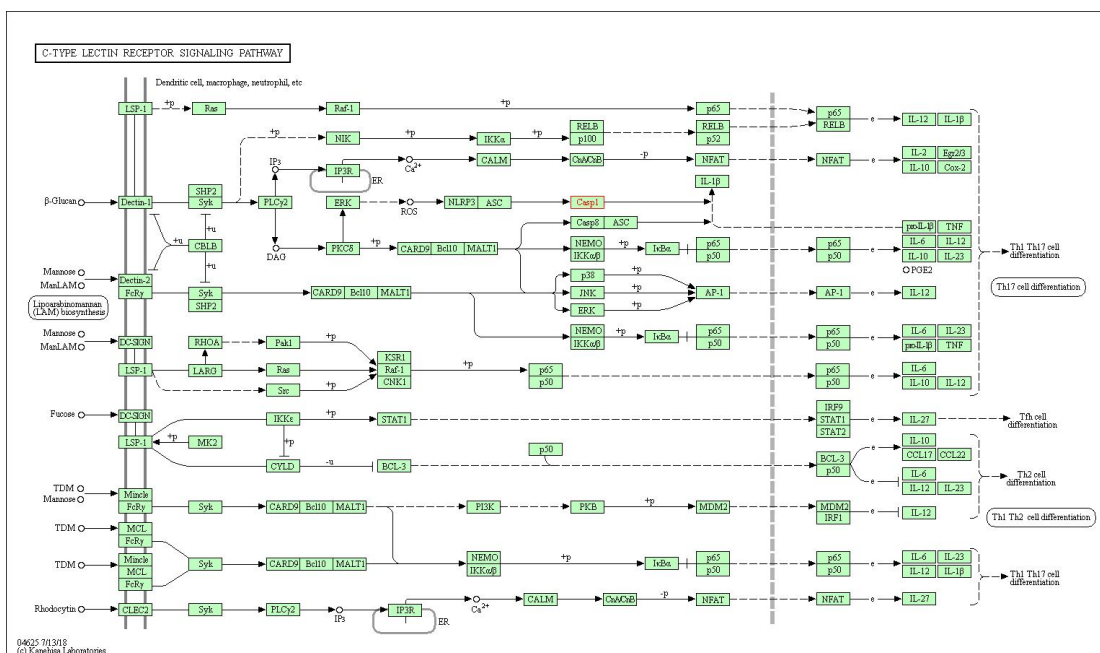

Supplementary Figure 1 Type C lectin receptor signaling pathway

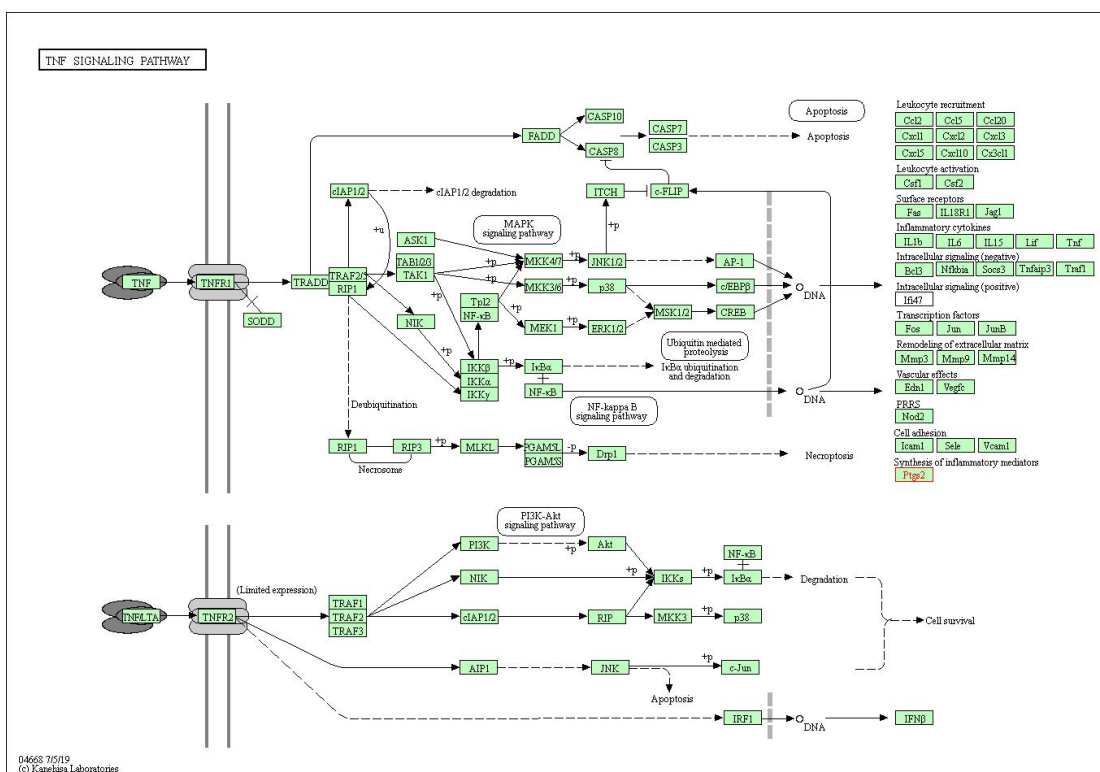

Supplementary Figure 2 TNF signaling pathway

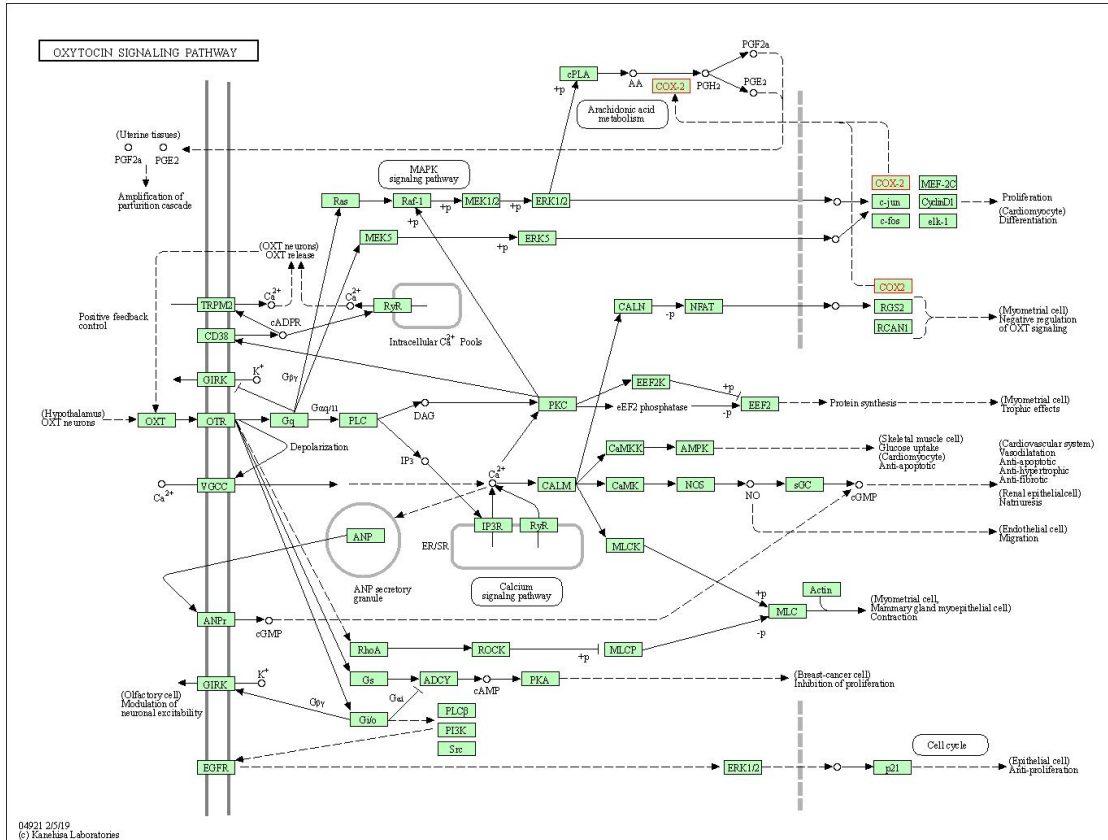

Supplementary Figure 3 Oxytocin signaling pathway

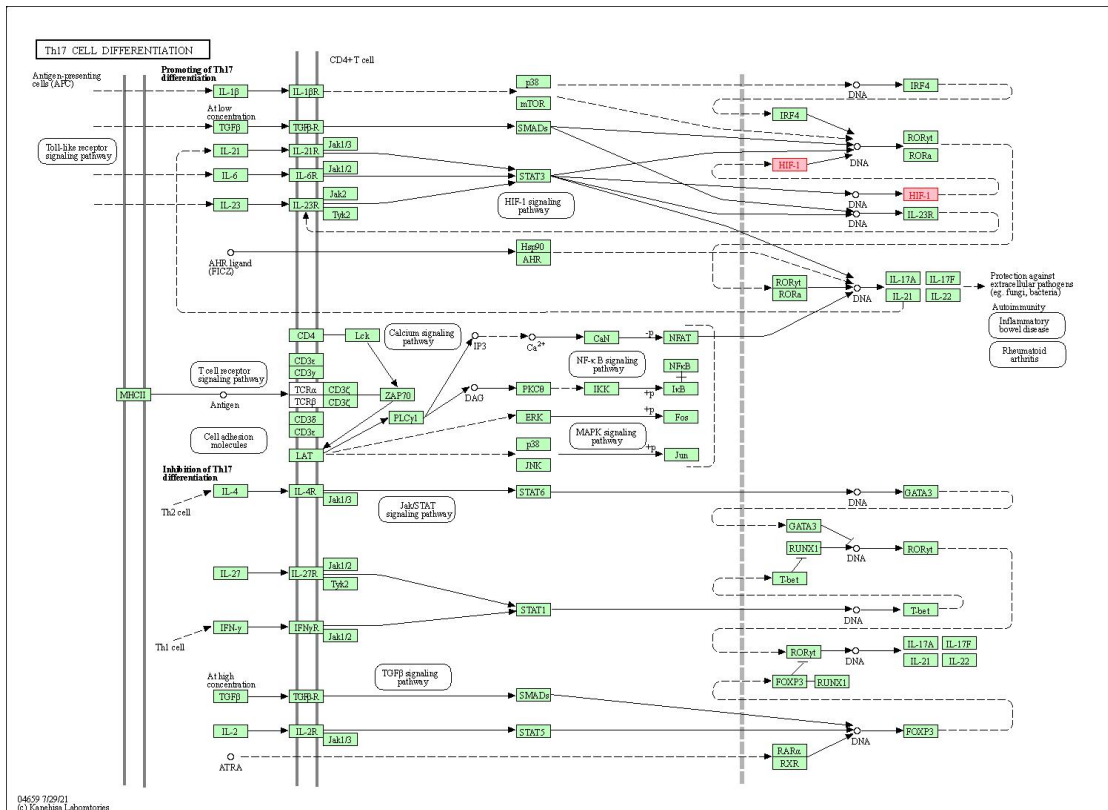

Supplementary Figure 4 Th17 cell differentiation

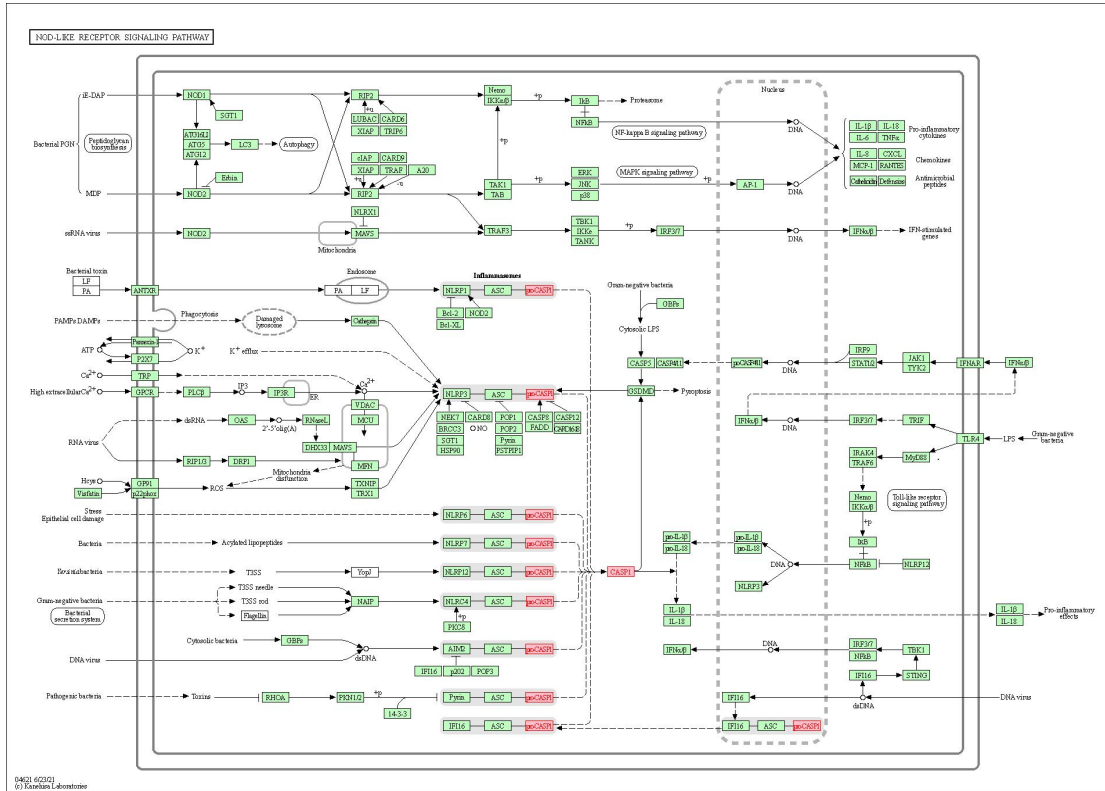

Supplementary Figure 5 NOD-like receptor signaling pathway



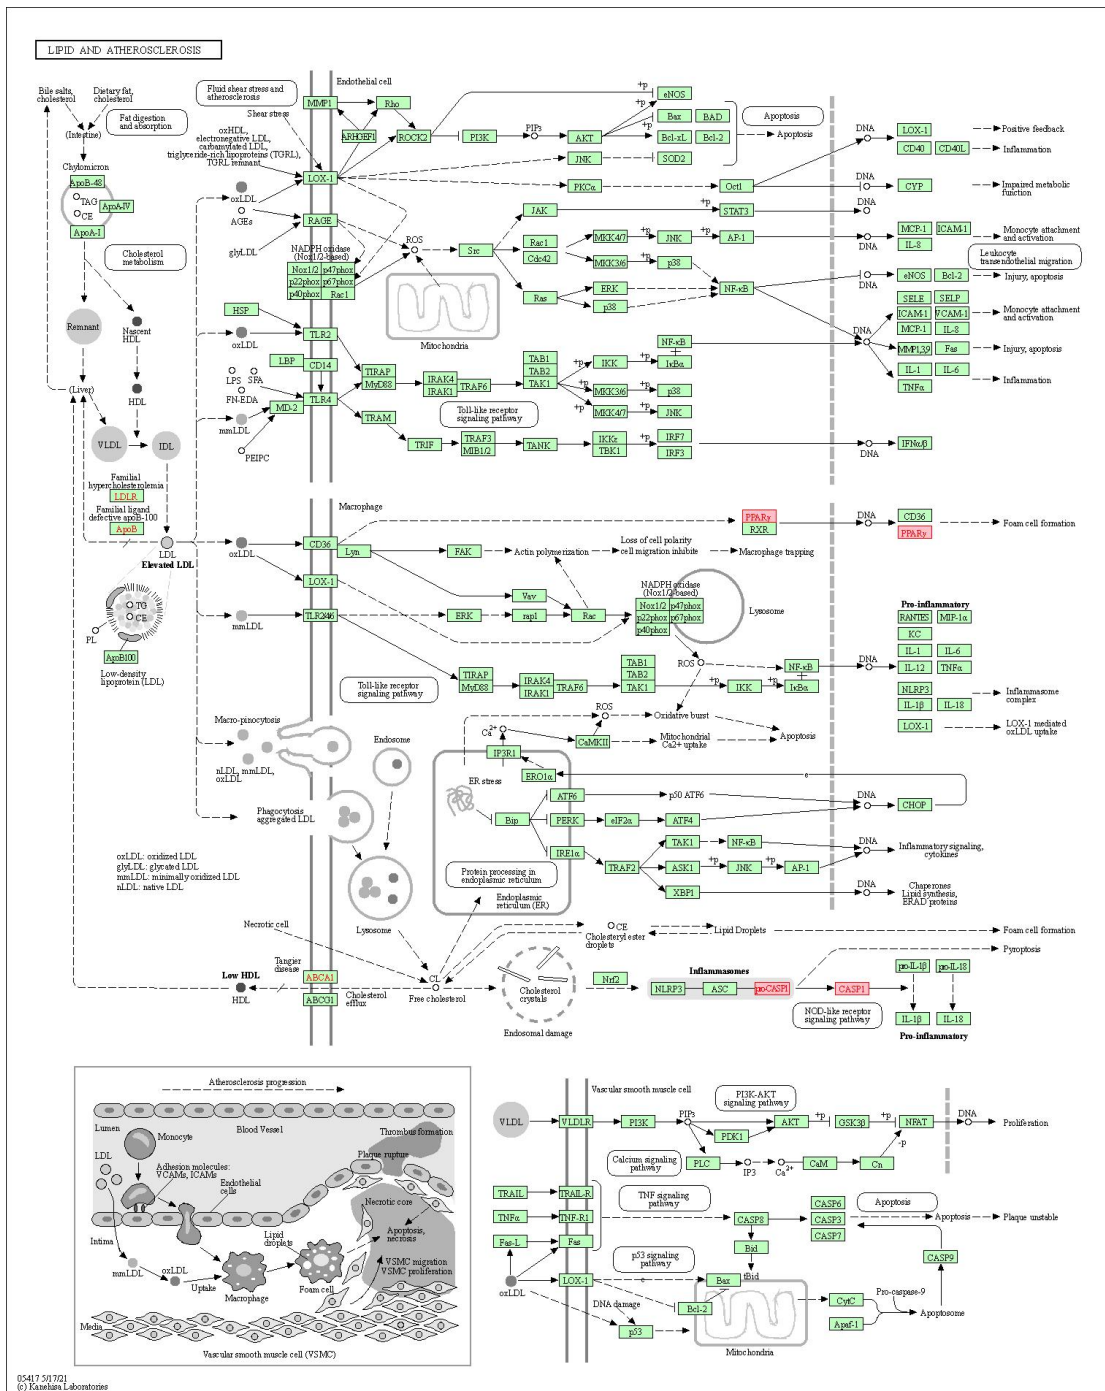

Supplementary Figure 6 Lipid and atherosclerosis

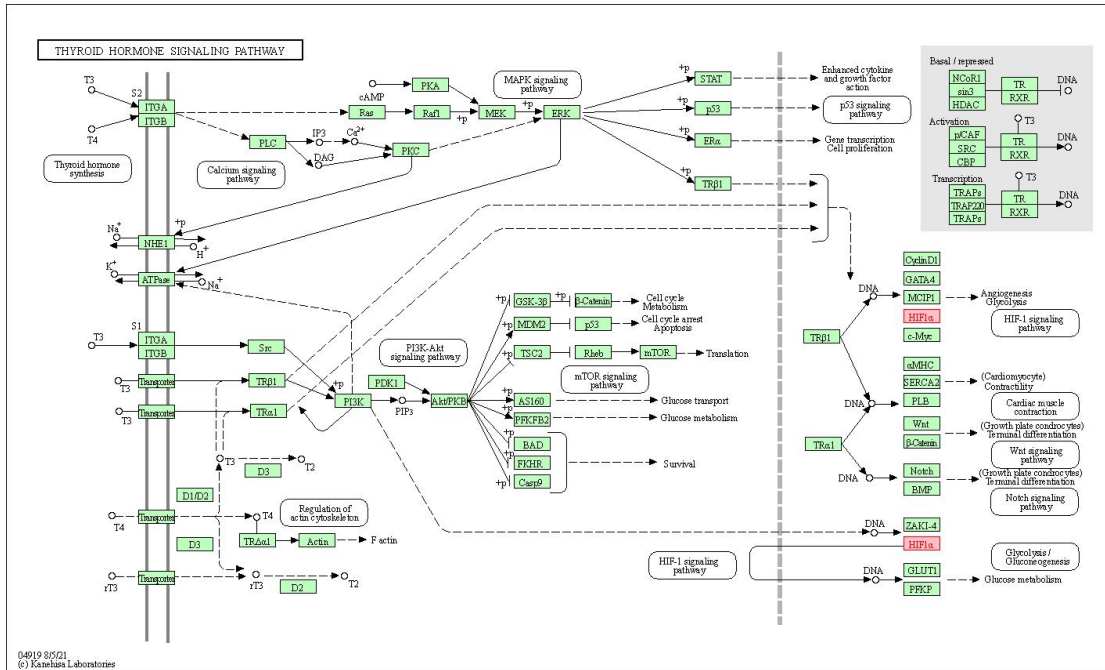

Supplementary Figure 7 Thyroid hormone signaling pathway
